# Supplementary material for: The cucurbit[7]uril effect on reference substances for NMR in deuterium oxide solution
Source: Royal Society of Chemistry journal article supplement (doi:10.1039/d2nj04120k), 2022-01-01
Supplement: d2nj04120k1.pdf [file d2nj04120k1.pdf]

## Supporting Information

### Cucurbit[7]uril effect on reference substances for NMR in deuterium oxide solution

Hiroyuki Tsutsumi\*, Tomonori Ohata, Rie Nakashima, Hirohito Ikeda

*Faculty of Pharmaceutical Sciences, Fukuoka University; 8-19-1 Nanakuma, Jonan-ku, Fukuoka-shi, Fukuoka, 814-0180, Japan*

#### Table of Contents

|                                                                                                                |    |
|----------------------------------------------------------------------------------------------------------------|----|
| 1. Effect of sodium ion on DSS or TSP forming the inclusion complex with CB[7] monitored by <sup>1</sup> H NMR | S1 |
| 2. Stoichiometric ratio of inclusion complex of DSS and CB[7], and TSP and CB[7]                               | S2 |
| 3. ITC of DSS and CB[7], and TSP and CB[7]                                                                     | S4 |
| 4. 1D ROESY between TSP and CB[7] under the complex formation condition                                        | S6 |
| 5. Molecular modeling calculation of inclusion complex of DSS and TSP with CB[7]                               | S7 |

# 1. Effect of sodium ion on DSS or TSP forming the inclusion complex with CB[7] monitored by $^1\text{H}$ NMR

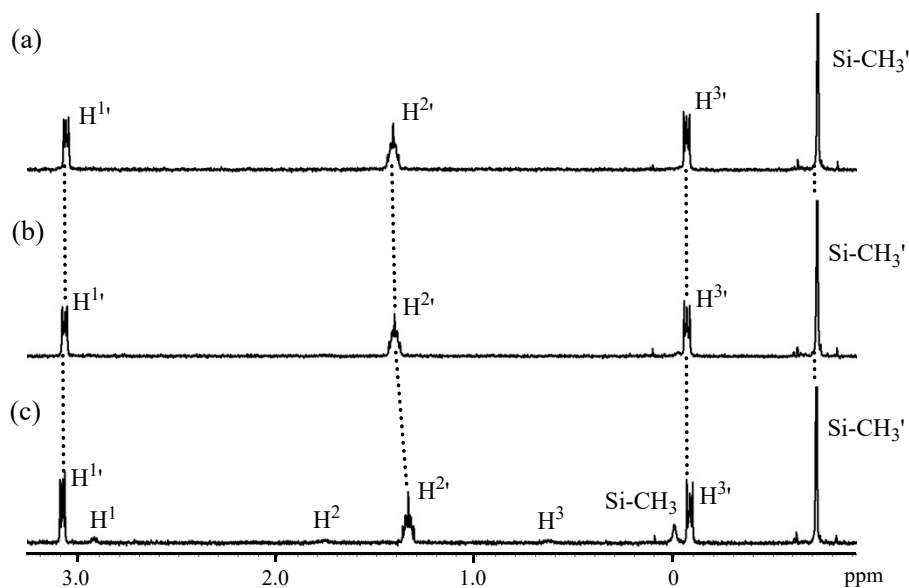

**Fig. S1** Effect of sodium ion on DSS forming the inclusion complex with CB[7] monitored by  $^1\text{H}$  NMR. Sodium ion concentration is (a) 1.5 mM (Fig. 2b), (b) 3.0 mM, and (c) 154 mM. The concentration of DSS and CB[7] is 1.5 mM, respectively. The  $\text{H}^{1'}$ ,  $\text{H}^{2'}$ ,  $\text{H}^{3'}$ , and  $\text{Si-CH}_3'$  indicate the  $\text{H}^1$ ,  $\text{H}^2$ ,  $\text{H}^3$ , and  $\text{Si-CH}_3$  of DSS forming the inclusion complex with CB[7], respectively.

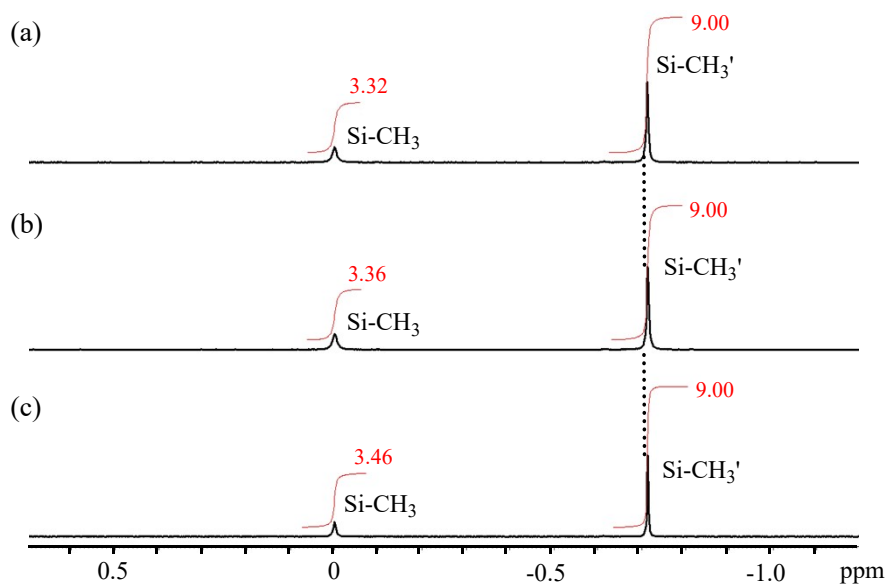

**Fig. S2** Effect of sodium ion on TSP forming the inclusion complex with CB[7] monitored by  $^1\text{H}$  NMR. Sodium ion concentration is (a) 1.5 mM (Fig. 3b), (b) 3.0 mM, and (c) 154 mM. The concentration of TSP and CB[7] is 1.5 mM, respectively. The  $\text{Si-CH}_3'$  indicate the  $\text{Si-CH}_3$  of TSP forming the inclusion complex with CB[7].

## 2. Stoichiometric ratio of inclusion complex DSS and CB[7], and TSP and CB[7]

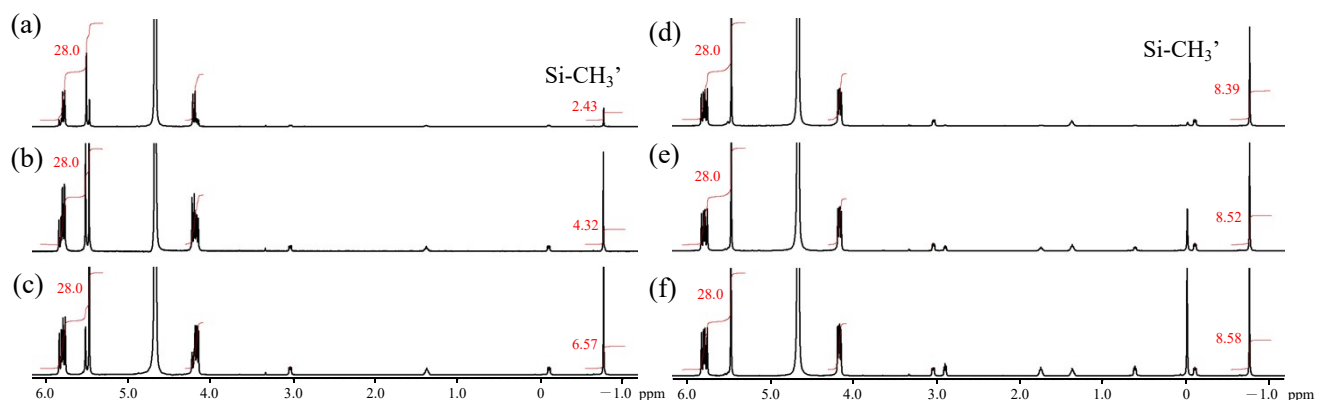

**Fig. S3** Quantitative NMR spectra of DSS and CB[7] mixture D<sub>2</sub>O solution. The CB[7] concentration is 1.5 mM (constant). The DSS concentrations are (a) 0.375, (b) 0.75, (c) 1.125, (d) 1.5, (e) 2.25, and (f) 3.0 mM. The Si-CH<sub>3</sub>' indicates the Si-CH<sub>3</sub> of DSS forming the inclusion complex with CB[7].

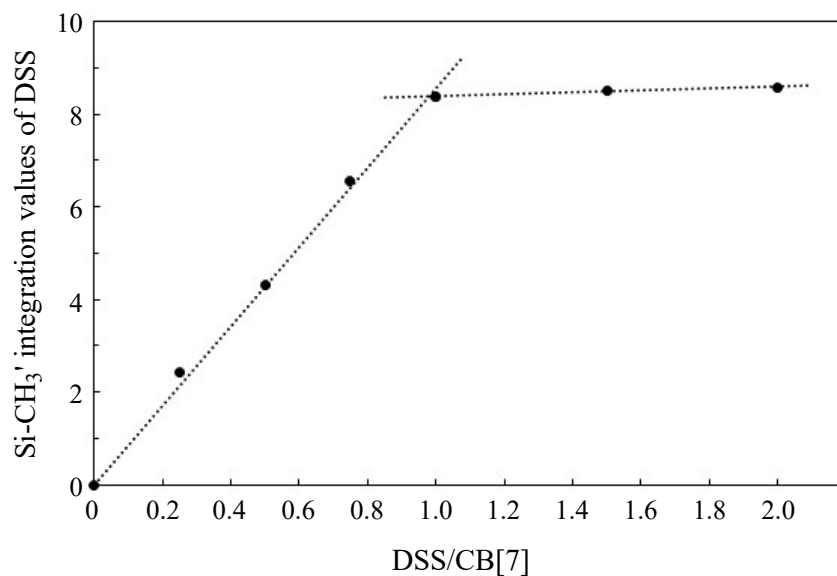

**Fig. S4** Stoichiometric ratio of inclusion complex of DSS and CB[7] in D<sub>2</sub>O solution. Stoichiometric ratio is determined with the Si-CH<sub>3</sub>' integration values of DSS when the concentration of CB[7] is constant (1.5 mM) and the concentrations of DSS changed from 0 to 3.0 mM.

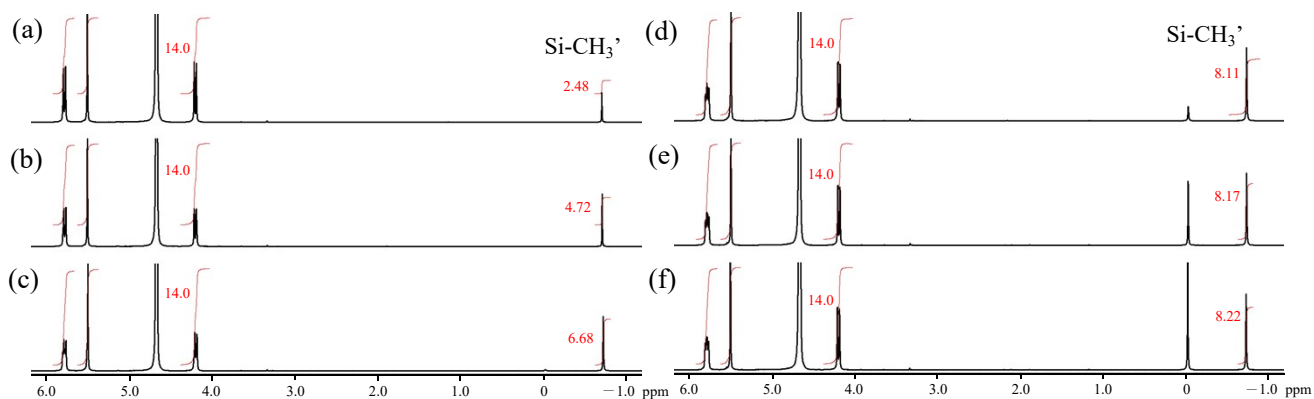

**Fig. S5** Quantitative NMR spectra of TSP and CB[7] mixture  $D_2O$  solution. The CB[7] concentration is 1.5 mM (constant). The TSP concentrations are (a) 0.375, (b) 0.75, (c) 1.125, (d) 1.5, (e) 2.25, and (f) 3.0 mM. The Si-CH<sub>3</sub>' indicates the Si-CH<sub>3</sub> of TSP forming the inclusion complex with CB[7].

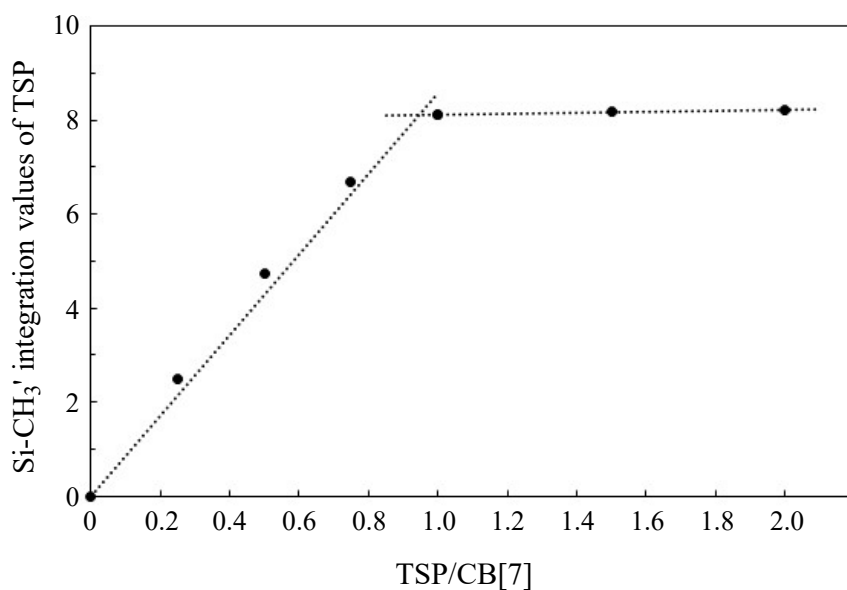

**Fig. S6** Stoichiometric ratio of the inclusion complex of TSP and CB[7] in  $D_2O$  solution. Stoichiometric ratio is determined with the Si-CH<sub>3</sub>' integration values of TSP when the concentration of CB[7] is constant (1.5 mM) and the concentrations of TSP change from 0 to 3.0 mM.

### 3. ITC of DSS and CB[7], and TSP and CB[7]

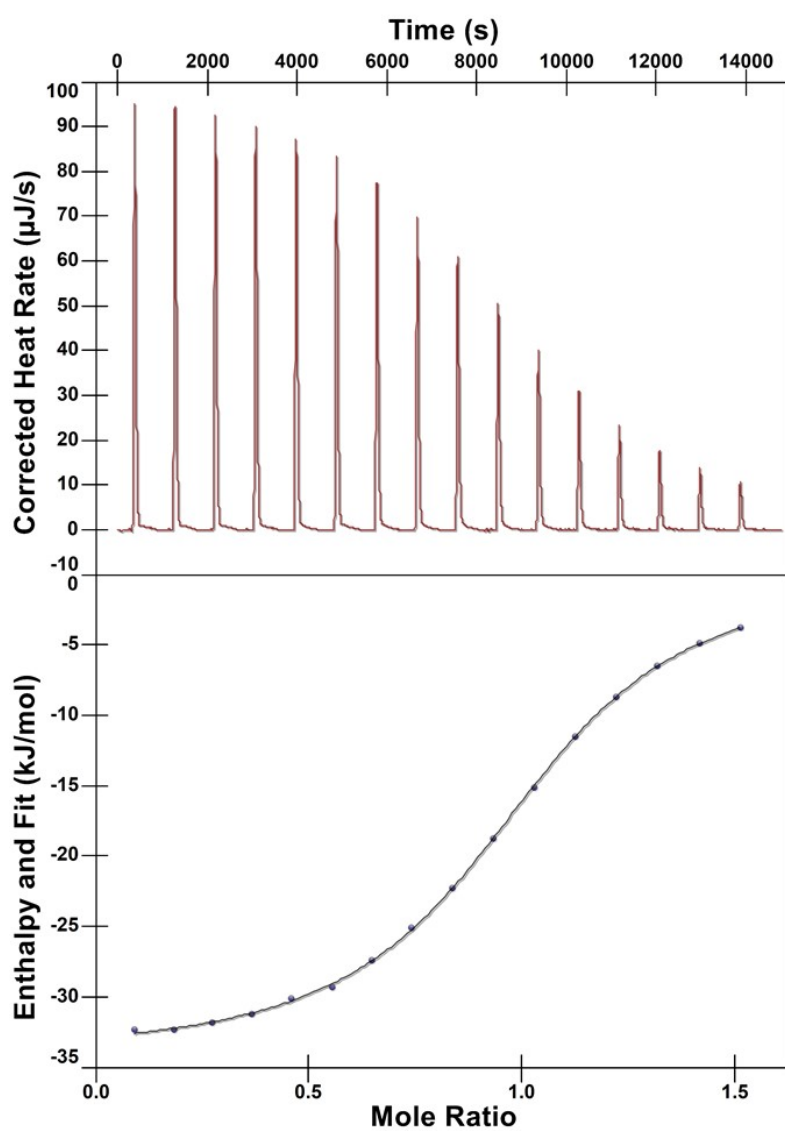

**Fig. S7** ITC of DSS and CB[7] in  $0.2 \text{ mol L}^{-1}$  phosphate buffer at 303.15 K.

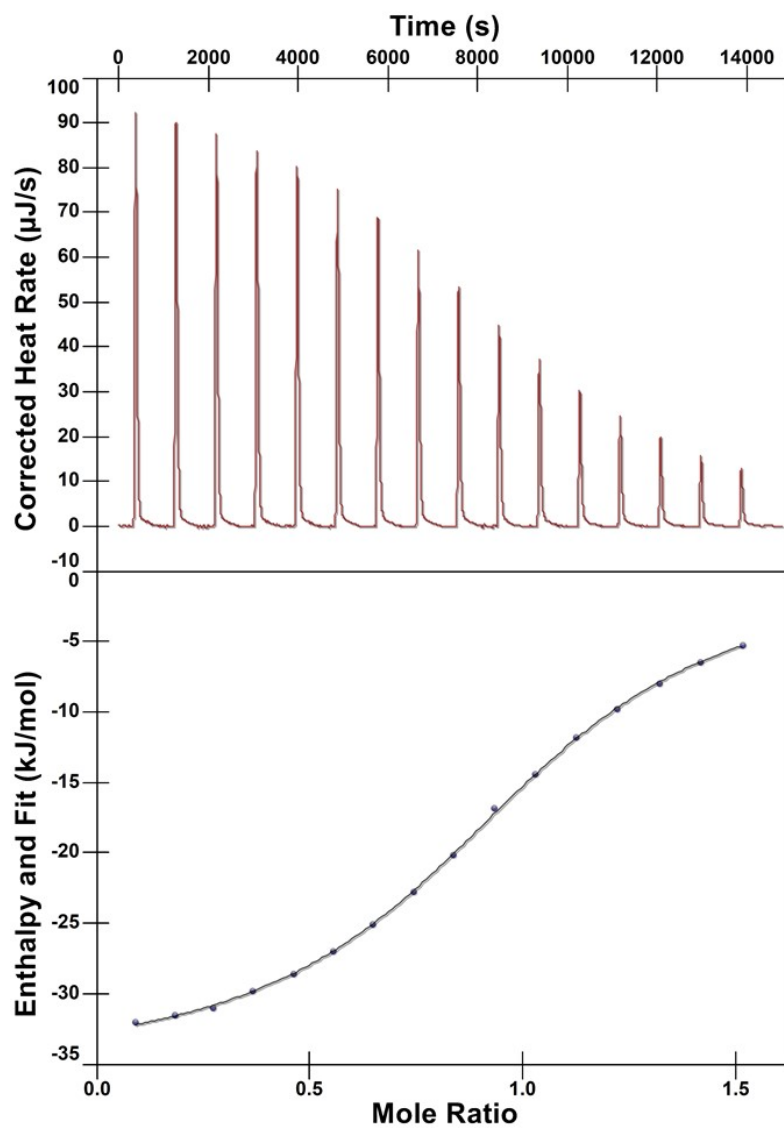

**Fig. S8** ITC of TSP and CB[7] in 0.2 mol L<sup>-1</sup> phosphate buffer at 303.15 K.

#### 4. 1D ROESY between TSP and CB[7] under the inclusion complexation condition

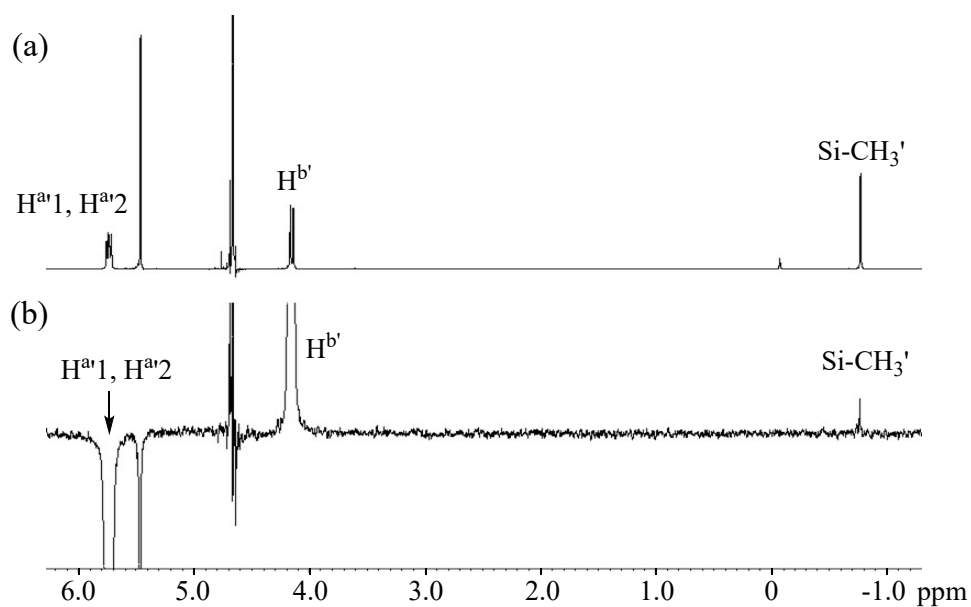

**Fig S9** ROEs between TSP and CB[7] under the inclusion complexation condition (TSP = CB[7] = 3 mM). (a)  $^1\text{H}$  NMR, (b) 1D ROESY irradiating at the  $\text{H}^{\text{a}'1}$  and  $\text{H}^{\text{a}'2}$  proton signals of CB[7].  $\text{H}^{\text{a}'1}$ ,  $\text{H}^{\text{a}'2}$ , and  $\text{Si-CH}_3'$  indicate that  $\text{H}^{\text{a}1}$  and  $\text{H}^{\text{a}2}$  of CB[7] and the  $\text{Si-CH}_3$  of TSP shifted because of the inclusion complexation between TSP and CB[7], respectively.

## 5. Molecular modeling calculation of inclusion complex of DSS and TSP with CB[7]

### Optimized structure of DSS using density functional theory (DFT) calculation

The conformational analysis of DSS was determined by using ChemBio3D Ultra ver. 14 (PerkinElmer Informatics, Inc., USA) and CONFLEX5 (CONFLEX corporation, Japan). Because CONFLEX5 cannot perform a conformational analysis of structures containing sodium atom, 4,4-dimethyl-4-silapentane-1-sulfonic acid (DSS-H), where the sodium atom of DSS is replaced by a hydrogen atom, was used as the initial structure. All of the various conformations of DSS-H obtained by CONFLEX5 were classified into six groups by clustering. Furthermore, the hydrogen atom in the sulfo group of these DSS-H was changed to a sodium atom, and these conformations were optimized with a solvent accessible surface (SAS) model at B3LYP/6-31+g(d) level by Gaussian 16 (Fig. S10 Groups A–F).

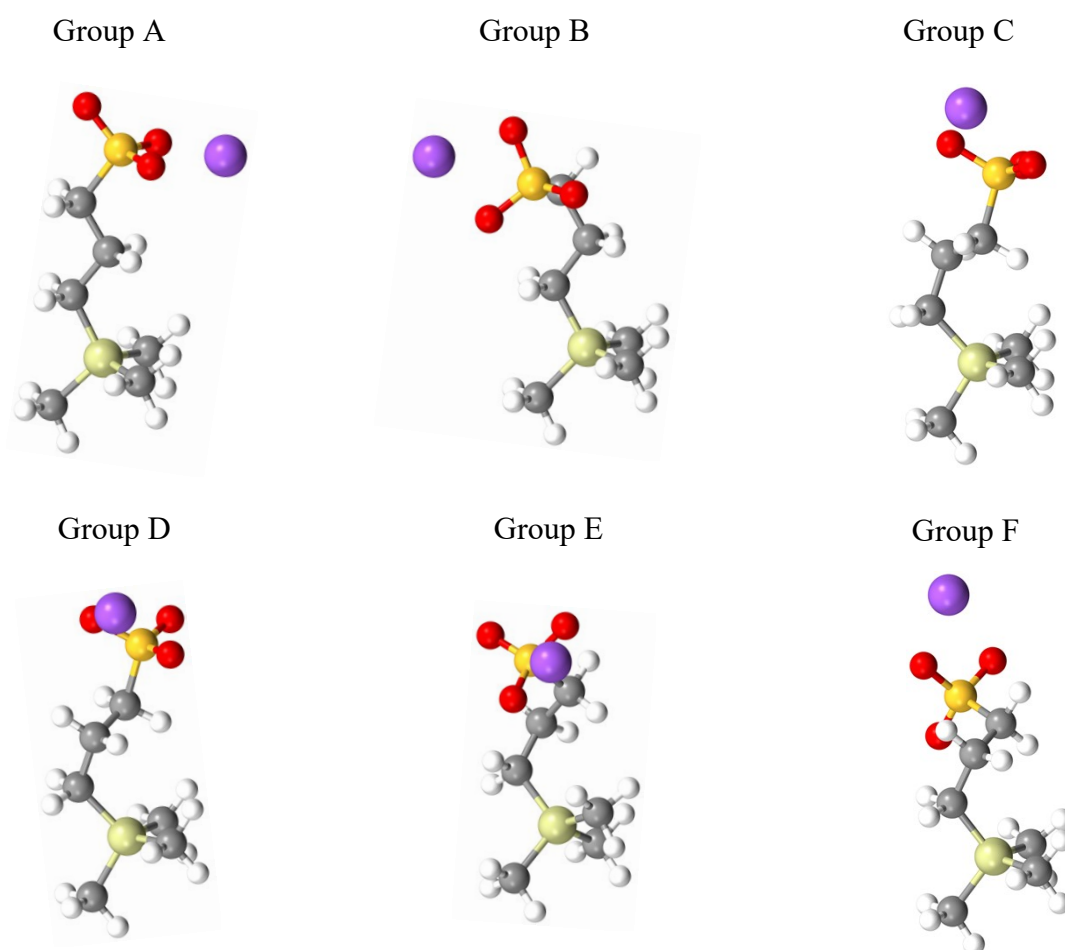

**Fig. S10** Optimized structures of DSS in each group.



**Table S1** Atomic coordinates and energies of DSS (Groups A–F).

## DSS\_Group A

$$E_{\text{DSS}_A} = -1313.4248973 \text{ (a.u.)}$$

|    |           |           |           |    |           |           |           |
|----|-----------|-----------|-----------|----|-----------|-----------|-----------|
| C  | 4.626575  | -1.028616 | -0.000626 | H  | 1.606597  | -1.714852 | -0.877607 |
| Si | 3.083360  | 0.072439  | 0.000001  | H  | 1.606665  | -1.715218 | 0.876881  |
| C  | 1.543225  | -1.052477 | -0.000224 | H  | 0.101241  | 0.320357  | 0.882549  |
| C  | 0.183374  | -0.325803 | -0.000025 | H  | 0.101121  | 0.320565  | -0.882435 |
| C  | -0.990998 | -1.307092 | -0.000050 | H  | -0.982431 | -1.948761 | -0.887591 |
| C  | 3.088375  | 1.166352  | 1.549452  | H  | -0.982406 | -1.948822 | 0.887448  |
| C  | 3.088021  | 1.167569  | -1.548590 | H  | 2.220314  | 1.836986  | 1.579806  |
| S  | -2.631232 | -0.519830 | -0.000002 | H  | 3.988293  | 1.794057  | 1.584109  |
| O  | -3.619636 | -1.618946 | 0.000047  | H  | 3.072640  | 0.562649  | 2.466177  |
| O  | -2.681743 | 0.376840  | 1.222913  | H  | 3.987843  | 1.795434  | -1.582854 |
| O  | -2.681830 | 0.376820  | -1.222916 | H  | 3.072282  | 0.564575  | -2.465783 |
| H  | 5.544349  | -0.426431 | -0.000616 | H  | 2.219856  | 1.838095  | -1.578333 |
| H  | 4.657178  | -1.676384 | -0.886261 | Na | -3.027649 | 2.234591  | -0.000004 |
| H  | 4.657518  | -1.676928 | 0.884599  |    |           |           |           |

## DSS\_Group B

$$E_{\text{DSS}_B} = -1313.4226021 \text{ (a.u.)}$$

|    |           |           |           |    |           |           |           |
|----|-----------|-----------|-----------|----|-----------|-----------|-----------|
| C  | 3.606485  | 1.998348  | -0.073627 | H  | 1.057779  | 0.802466  | 1.476486  |
| Si | 2.932386  | 0.225498  | -0.033071 | H  | 0.560450  | 0.932340  | -0.197485 |
| C  | 1.107954  | 0.288381  | 0.503164  | H  | 0.441742  | -1.612346 | -0.341438 |
| C  | 0.396228  | -1.072906 | 0.612556  | H  | 0.915134  | -1.702913 | 1.348741  |
| C  | -1.072463 | -1.008003 | 1.056496  | H  | -1.450762 | -2.003774 | 1.311001  |
| C  | 3.086487  | -0.542946 | -1.760904 | H  | -1.211927 | -0.354063 | 1.923688  |
| C  | 3.949355  | -0.799476 | 1.199922  | H  | 2.732580  | -1.581521 | -1.778267 |
| S  | -2.234422 | -0.416789 | -0.217753 | H  | 4.130742  | -0.545684 | -2.099811 |
| O  | -1.976585 | 1.064613  | -0.423000 | H  | 2.499218  | 0.017628  | -2.499534 |
| O  | -2.017983 | -1.249406 | -1.420095 | H  | 5.011713  | -0.808650 | 0.923075  |
| O  | -3.609297 | -0.551224 | 0.409661  | H  | 3.877566  | -0.390620 | 2.216365  |
| H  | 4.659822  | 2.018149  | -0.382206 | H  | 3.612885  | -1.843460 | 1.238730  |
| H  | 3.542533  | 2.474285  | 0.913573  | Na | -4.030808 | 1.654009  | 0.264971  |
| H  | 3.043422  | 2.623465  | -0.778717 |    |           |           |           |

## DSS\_Group C

$$E_{\text{DSS}_C} = -1313.4217914 \text{ (a.u.)}$$

|    |           |           |           |    |           |           |           |
|----|-----------|-----------|-----------|----|-----------|-----------|-----------|
| C  | -4.587034 | 0.585191  | 0.668891  | H  | -1.861731 | 1.646216  | 1.491359  |
| Si | -2.914206 | 0.074344  | -0.065099 | H  | -1.633585 | 0.013492  | 2.071512  |
| C  | -1.564714 | 0.637133  | 1.166528  | H  | -0.015070 | 1.320583  | -0.207091 |
| C  | -0.093111 | 0.707876  | 0.699254  | H  | 0.507225  | 1.205617  | 1.471506  |
| C  | 0.523045  | -0.665033 | 0.427210  | H  | 0.470660  | -1.314221 | 1.307991  |
| C  | -2.927892 | -1.807563 | -0.317547 | H  | 0.041604  | -1.182704 | -0.407299 |
| C  | -2.665504 | 0.936377  | -1.735821 | H  | -2.035101 | -2.172576 | -0.839210 |
| S  | 2.286460  | -0.614115 | -0.017672 | H  | -3.798999 | -2.104873 | -0.916303 |
| O  | 3.003471  | 0.083789  | 1.122155  | H  | -2.992487 | -2.339494 | 0.640547  |
| O  | 2.697231  | -2.016609 | -0.238431 | H  | -3.466605 | 0.668512  | -2.436865 |
| O  | 2.397010  | 0.278260  | -1.239351 | H  | -2.673682 | 2.028886  | -1.628502 |
| H  | -5.416151 | 0.282004  | 0.016567  | H  | -1.712828 | 0.657608  | -2.203662 |
| H  | -4.652415 | 1.672589  | 0.803219  | Na | 3.756137  | 1.741401  | -0.202299 |
| H  | -4.753245 | 0.120557  | 1.649608  |    |           |           |           |

## DSS\_Group D

$$E_{\text{DSS}_D} = -1313.4217914 \text{ (a.u.)}$$

|    |           |           |           |    |           |           |           |
|----|-----------|-----------|-----------|----|-----------|-----------|-----------|
| C  | 4.587121  | -0.584573 | -0.669402 | H  | 1.633567  | -0.013434 | -2.071370 |
| Si | 2.914326  | -0.074358 | 0.065095  | H  | 1.861688  | -1.646193 | -1.491306 |
| C  | 1.564714  | -0.637117 | -1.166409 | H  | -0.507215 | -1.205662 | -1.471285 |
| C  | 0.093133  | -0.707865 | -0.699074 | H  | 0.015126  | -1.320533 | 0.207303  |
| C  | -0.523069 | 0.665034  | -0.427096 | H  | -0.041702 | 1.182764  | 0.407419  |
| C  | 2.666303  | -0.936955 | 1.735623  | H  | -0.470684 | 1.314193  | -1.307899 |
| C  | 2.927504  | 1.807498  | 0.318007  | H  | 1.713639  | -0.658682 | 2.203787  |
| S  | -2.286492 | 0.614071  | 0.017704  | H  | 3.467484  | -0.669006 | 2.436546  |
| O  | -2.397115 | -0.278363 | 1.239327  | H  | 2.674863  | -2.029431 | 1.627964  |
| O  | -2.697245 | 2.016567  | 0.238503  | H  | 3.799366  | 2.105124  | 0.915505  |
| O  | -3.003500 | -0.083755 | -1.122212 | H  | 2.990358  | 2.339693  | -0.640060 |
| H  | 5.416258  | -0.281710 | -0.016949 | H  | 2.035317  | 2.171915  | 0.841123  |
| H  | 4.753207  | -0.119298 | -1.649839 | Na | -3.756538 | -1.741245 | 0.202187  |
| H  | 4.652601  | -1.671881 | -0.804419 |    |           |           |           |

## DSS\_Group E

$$E_{\text{DSS}_E} = -1313.4200164 \text{ (a.u.)}$$

|    |           |           |           |    |           |           |           |
|----|-----------|-----------|-----------|----|-----------|-----------|-----------|
| C  | 3.556929  | 0.990949  | 1.44887   | H  | 1.858887  | -1.61204  | 1.424095  |
| Si | 2.549373  | 0.257158  | 0.01786   | H  | 0.633334  | -0.359979 | 1.469213  |
| C  | 1.272885  | -0.932694 | 0.785197  | H  | 1.022773  | -2.308657 | -0.885482 |
| C  | 0.393899  | -1.80256  | -0.139219 | H  | -0.082087 | -2.599234 | 0.445929  |
| C  | -0.712832 | -1.077269 | -0.915215 | H  | -0.348481 | -0.211141 | -1.473989 |
| C  | 1.752595  | 1.685269  | -0.947477 | H  | -1.196869 | -1.760511 | -1.620712 |
| C  | 3.713969  | -0.698849 | -1.13825  | H  | 1.325396  | 1.357006  | -1.903396 |
| S  | -2.090225 | -0.462691 | 0.110258  | H  | 2.497873  | 2.458889  | -1.175161 |
| O  | -2.522961 | -1.579534 | 0.976291  | H  | 0.949898  | 2.152235  | -0.363834 |
| O  | -1.590377 | 0.759687  | 0.859619  | H  | 4.492231  | -0.039845 | -1.544879 |
| O  | -3.135425 | 0.01497   | -0.880184 | H  | 4.218729  | -1.518977 | -0.611065 |
| H  | 4.333695  | 1.673594  | 1.080428  | H  | 3.178065  | -1.135066 | -1.991212 |
| H  | 4.055677  | 0.207013  | 2.03344   | Na | -3.088905 | 2.126414  | -0.113003 |
| H  | 2.916647  | 1.558946  | 2.136253  |    |           |           |           |

## DSS\_Group F

$$E_{\text{DSS}_F} = -1313.4197552 \text{ (a.u.)}$$

|    |           |           |           |    |           |           |           |
|----|-----------|-----------|-----------|----|-----------|-----------|-----------|
| C  | -3.911675 | -0.873913 | -1.273138 | H  | -0.799003 | -0.123553 | -1.494004 |
| Si | -2.765872 | -0.075844 | 0.012709  | H  | -1.761041 | 1.326606  | -1.713666 |
| C  | -1.303222 | 0.682583  | -0.946289 | H  | 0.370608  | 2.071459  | -0.914277 |
| C  | -0.253562 | 1.527931  | -0.193430 | H  | -0.757434 | 2.297490  | 0.408712  |
| C  | 0.685094  | 0.773809  | 0.758985  | H  | 1.286629  | 1.478767  | 1.341301  |
| C  | -3.718461 | 1.286536  | 0.931900  | H  | 0.151124  | 0.122944  | 1.456753  |
| C  | -2.234756 | -1.409173 | 1.255594  | H  | -3.099489 | 1.775719  | 1.695216  |
| S  | 1.907652  | -0.304934 | -0.056868 | H  | -4.598994 | 0.874335  | 1.442003  |
| O  | 1.183183  | -1.426016 | -0.693219 | H  | -4.070870 | 2.065604  | 0.243255  |
| O  | 2.676472  | 0.578764  | -1.021342 | H  | -3.103291 | -1.997839 | 1.579955  |
| O  | 2.866947  | -0.720610 | 1.042331  | H  | -1.506018 | -2.097312 | 0.810275  |
| H  | -4.798944 | -1.312899 | -0.798559 | H  | -1.780260 | -0.981029 | 2.158013  |
| H  | -3.398093 | -1.675786 | -1.819323 | Na | 4.630155  | 0.261225  | 0.047707  |
| H  | -4.260172 | -0.140953 | -2.012353 |    |           |           |           |

### Optimized structure of TSP using DFT calculation

The conformational analysis of TSP was determined by ChemBio3D Ultra ver. 14 and CONFLEX5. Because CONFLEX5 cannot perform a conformational analysis of structures containing sodium atom, 3-(trimethylsilyl) propionic acid (TSP-H), where the sodium atom of TSP is replaced by a hydrogen atom, was used as the initial structure. All of the various different conformations of TSP-H obtained by CONFLEX5 were classified into two groups by clustering. Furthermore, the hydrogen atom in the carboxyl group of these TSP-H was changed to a sodium atom, and these conformations were optimized with a SAS model at B3LYP/6-31+g(d) level by Gaussian 16 (Fig. S11 Groups A and B).

Group A

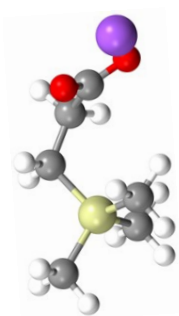

Group B

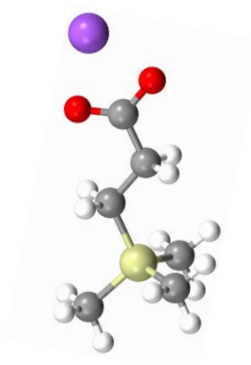

**Fig. S11** Optimized structures of TSP in each group.

**Table S2** Atomic coordinates and energies of TSP (Groups A and B).

## TSP\_Group A

$$E_{\text{TSP}_A} = -838.8544038 \text{ (a.u.)}$$

|    |           |           |           |    |           |           |           |
|----|-----------|-----------|-----------|----|-----------|-----------|-----------|
| C  | 2.543071  | 0.813910  | 1.476764  | H  | 2.786590  | -1.445980 | -1.879844 |
| Si | 1.781984  | -0.179087 | 0.046776  | H  | 3.781345  | -0.037416 | -1.476794 |
| C  | 3.182311  | -0.850759 | -1.046521 | H  | 3.862733  | -1.494834 | -0.474102 |
| C  | 0.799354  | -1.633598 | 0.763251  | H  | 0.323548  | -2.219436 | -0.032522 |
| C  | 0.693477  | 0.962352  | -1.019091 | H  | 0.006720  | -1.287203 | 1.437730  |
| C  | -0.551843 | 1.570641  | -0.341631 | H  | 1.455259  | -2.304557 | 1.333985  |
| C  | -1.712368 | 0.591195  | -0.140814 | H  | 1.342756  | 1.777101  | -1.375658 |
| O  | -2.391345 | 0.674309  | 0.933663  | H  | 0.369713  | 0.412350  | -1.912264 |
| O  | -1.973938 | -0.237792 | -1.070172 | H  | -0.312698 | 2.024370  | 0.626119  |
| H  | 1.770674  | 1.220312  | 2.142175  | H  | -0.950537 | 2.380991  | -0.971544 |
| H  | 3.139470  | 1.658267  | 1.106653  | Na | -3.684492 | -0.961462 | 0.152219  |
| H  | 3.204314  | 0.184748  | 2.087118  |    |           |           |           |

## TSP\_Group B

$$E_{\text{TSP}_B} = -838.8558762 \text{ (a.u.)}$$

|    |           |           |           |    |           |           |           |
|----|-----------|-----------|-----------|----|-----------|-----------|-----------|
| C  | 2.613991  | 0.960662  | -1.546647 | H  | 3.067680  | -2.252809 | 0.885043  |
| Si | 2.204022  | -0.062416 | 0.000074  | H  | 3.068653  | -2.252190 | -0.885324 |
| C  | 3.268256  | -1.634672 | 0.000187  | H  | 4.339485  | -1.394221 | 0.000856  |
| C  | 2.614743  | 0.961501  | 1.546039  | H  | 2.386012  | 0.406367  | 2.465288  |
| C  | 0.372059  | -0.565150 | 0.000657  | H  | 2.045059  | 1.899101  | 1.575840  |
| C  | -0.635584 | 0.592603  | -0.000430 | H  | 3.680488  | 1.223745  | 1.575592  |
| C  | -2.118271 | 0.194016  | -0.000077 | H  | 0.183723  | -1.209107 | -0.870098 |
| O  | -2.968699 | 1.143695  | 0.000190  | H  | 0.183812  | -1.207381 | 0.872712  |
| O  | -2.441970 | -1.034362 | -0.000200 | H  | -0.490584 | 1.245644  | 0.871063  |
| H  | 2.044962  | 1.898665  | -1.576247 | H  | -0.490602 | 1.243906  | -0.873236 |
| H  | 2.384022  | 0.405374  | -2.465494 | Na | -4.576793 | -0.389439 | 0.000178  |
| H  | 3.679899  | 1.222127  | -1.577269 |    |           |           |           |

### Most stable structure of CB[7] using DFT calculation

The conformational analysis of CB[7] was determined by ChemBio3D Ultra ver. 14 and CONFLEX5. The number of CB[7] conformations is only one, as the CB[7] structure is rigid. The obtained conformation was optimized with a SAS model at B3LYP/6-31+g(d) level by Gaussian 16 (Fig. S12).

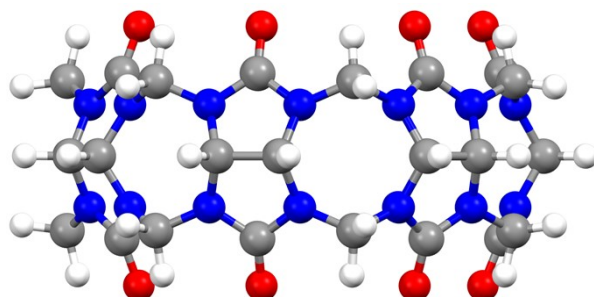

Fig. S12 Most stable structure of CB[7].

**Table S3** Atomic coordinates and energy of CB[7].

$$E_{\text{CB}[7]} = -4212.4243543 \text{ (a.u.)}$$

|   |           |           |           |   |           |           |          |
|---|-----------|-----------|-----------|---|-----------|-----------|----------|
| N | -1.231945 | 1.121111  | -5.137575 | C | 0.000000  | -1.821800 | 5.587715 |
| C | 0.000000  | 0.783516  | -5.822607 | H | 0.000000  | -1.866965 | 6.686432 |
| H | 0.000000  | 1.218891  | -6.832410 | N | 1.232064  | -1.220966 | 5.116540 |
| N | 1.231945  | 1.121111  | -5.137575 | C | -1.795316 | 0.000000  | 5.655016 |
| C | -1.985911 | 0.000000  | -4.810885 | H | -2.859017 | 0.000000  | 5.407499 |
| O | -3.117624 | 0.000000  | -4.359278 | H | -1.668187 | 0.000000  | 6.747384 |
| C | 1.985911  | 0.000000  | -4.810885 | C | 1.795316  | 0.000000  | 5.655016 |
| O | 3.117624  | 0.000000  | -4.359278 | H | 2.859017  | 0.000000  | 5.407499 |
| N | -1.231945 | -1.121111 | -5.137575 | H | 1.668187  | 0.000000  | 6.747384 |
| C | 0.000000  | -0.783516 | -5.822607 | N | -1.232064 | 1.220966  | 5.116540 |
| H | 0.000000  | -1.218891 | -6.832410 | C | 0.000000  | 1.821800  | 5.587715 |
| N | 1.231945  | -1.121111 | -5.137575 | H | 0.000000  | 1.866965  | 6.686432 |
| C | -1.794785 | -2.455097 | -5.095303 | N | 1.232064  | 1.220966  | 5.116540 |
| H | -2.858828 | -2.348665 | -4.873500 | C | -1.985896 | 2.089926  | 4.336383 |
| H | -1.666044 | -2.927492 | -6.080010 | O | -3.117341 | 1.894174  | 3.928606 |
| C | 1.794785  | -2.455097 | -5.095303 | C | 1.985896  | 2.089926  | 4.336383 |
| H | 2.858828  | -2.348665 | -4.873500 | O | 3.117341  | 1.894174  | 3.928606 |
| H | 1.666044  | -2.927492 | -6.080010 | N | -1.231878 | 3.241675  | 4.144957 |
| N | -1.232176 | -3.322916 | -4.081204 | C | 0.000000  | 3.234294  | 4.908656 |
| C | 0.000000  | -4.068578 | -4.245363 | H | 0.000000  | 4.064187  | 5.630101 |
| H | 0.000000  | -4.585442 | -5.215996 | N | 1.231878  | 3.241675  | 4.144957 |
| N | 1.232176  | -3.322916 | -4.081204 | C | -1.794624 | 4.424730  | 3.527207 |
| C | -1.986152 | -3.768106 | -3.001775 | H | -2.858600 | 4.232058  | 3.373701 |
| O | -3.117717 | -3.415138 | -2.719367 | H | -1.666052 | 5.278247  | 4.208664 |
| C | 1.986152  | -3.768106 | -3.001775 | C | 1.794624  | 4.424730  | 3.527207 |
| O | 3.117717  | -3.415138 | -2.719367 | H | 2.858600  | 4.232058  | 3.373701 |
| N | -1.232052 | -4.722963 | -2.329945 | H | 1.666052  | 5.278247  | 4.208664 |
| C | 0.000000  | -5.047249 | -3.021307 | N | -1.232041 | 4.765678  | 2.236776 |
| H | 0.000000  | -6.107785 | -3.311979 | C | 0.000000  | 5.508781  | 2.060776 |
| N | 1.232052  | -4.722963 | -2.329945 | H | 0.000000  | 6.395799  | 2.710709 |
| C | -1.794051 | -5.520351 | -1.259255 | N | 1.232041  | 4.765678  | 2.236776 |
| H | -1.664233 | -6.585053 | -1.501925 | C | -1.985247 | 4.695893  | 1.070713 |
| H | -2.858335 | -5.281469 | -1.204801 | O | -3.115794 | 4.252802  | 0.969343 |
| C | 1.794051  | -5.520351 | -1.259255 | C | 1.985247  | 4.695893  | 1.070713 |
| H | 2.858335  | -5.281469 | -1.204801 | O | 3.115794  | 4.252802  | 0.969343 |
| H | 1.664233  | -6.585053 | -1.501925 | N | -1.231930 | 5.265915  | 0.051186 |
| N | -1.231930 | -5.265915 | 0.051186  | C | 0.000000  | 5.858482  | 0.533159 |

|   |           |           |          |   |           |          |           |
|---|-----------|-----------|----------|---|-----------|----------|-----------|
| C | 0.000000  | -5.858482 | 0.533159 | H | 0.000000  | 6.939943 | 0.333992  |
| H | 0.000000  | -6.939943 | 0.333992 | N | 1.231930  | 5.265915 | 0.051186  |
| N | 1.231930  | -5.265915 | 0.051186 | C | -1.794051 | 5.520351 | -1.259255 |
| C | -1.985247 | -4.695893 | 1.070713 | H | -1.664233 | 6.585053 | -1.501925 |
| O | -3.115794 | -4.252802 | 0.969343 | H | -2.858335 | 5.281469 | -1.204801 |
| C | 1.985247  | -4.695893 | 1.070713 | C | 1.794051  | 5.520351 | -1.259255 |
| O | 3.115794  | -4.252802 | 0.969343 | H | 2.858335  | 5.281469 | -1.204801 |
| N | -1.232041 | -4.765678 | 2.236776 | H | 1.664233  | 6.585053 | -1.501925 |
| C | 0.000000  | -5.508781 | 2.060776 | N | -1.232052 | 4.722963 | -2.329945 |
| H | 0.000000  | -6.395799 | 2.710709 | C | 0.000000  | 5.047249 | -3.021307 |
| N | 1.232041  | -4.765678 | 2.236776 | H | 0.000000  | 6.107785 | -3.311979 |
| C | -1.794624 | -4.424730 | 3.527207 | N | 1.232052  | 4.722963 | -2.329945 |
| H | -2.858600 | -4.232058 | 3.373701 | C | -1.986152 | 3.768106 | -3.001775 |
| H | -1.666052 | -5.278247 | 4.208664 | O | -3.117717 | 3.415138 | -2.719367 |
| C | 1.794624  | -4.424730 | 3.527207 | C | 1.986152  | 3.768106 | -3.001775 |
| H | 2.858600  | -4.232058 | 3.373701 | O | 3.117717  | 3.415138 | -2.719367 |
| H | 1.666052  | -5.278247 | 4.208664 | N | -1.232176 | 3.322916 | -4.081204 |
| N | -1.231878 | -3.241675 | 4.144957 | C | 0.000000  | 4.068578 | -4.245363 |
| C | 0.000000  | -3.234294 | 4.908656 | H | 0.000000  | 4.585442 | -5.215996 |
| H | 0.000000  | -4.064187 | 5.630101 | N | 1.232176  | 3.322916 | -4.081204 |
| N | 1.231878  | -3.241675 | 4.144957 | C | -1.794785 | 2.455097 | -5.095303 |
| C | -1.985896 | -2.089926 | 4.336383 | H | -2.858828 | 2.348665 | -4.873500 |
| O | -3.117341 | -1.894174 | 3.928606 | H | -1.666044 | 2.927492 | -6.080010 |
| C | 1.985896  | -2.089926 | 4.336383 | C | 1.794785  | 2.455097 | -5.095303 |
| O | 3.117341  | -1.894174 | 3.928606 | H | 1.666044  | 2.927492 | -6.080010 |
| N | -1.232064 | -1.220966 | 5.116540 | H | 2.858828  | 2.348665 | -4.873500 |



## Optimized structure of inclusion complex of DSS and CB[7] using DFT calculation

The initial conformers of the inclusion complex of DSS and CB[7] were constructed, in which the trimethylsilyl group of Group A–F DSS was located in the CB[7] cavity based on the inclusion complex structure estimated by NMR measurements. All conformations in water were optimized with a SAS model at B3LYP/6-31+g(d) level, the structures with the smallest energy were regarded as the optimized conformation of the inclusion complex (Fig. S13 Groups A'–F'). The stabilization energies  $E$  ( $\text{kJ mol}^{-1}$ ) for the inclusion complexation were calculated using the following equation:  $E = E_{\text{DSS\_complex}} - (E_{\text{DSS}} + E_{\text{CB[7]}})$ , where  $E_{\text{DSS\_complex}}$ ,  $E_{\text{DSS}}$ , and  $E_{\text{CB[7]}}$  represent the total energy of the inclusion complex, DSS, and CB[7], respectively.

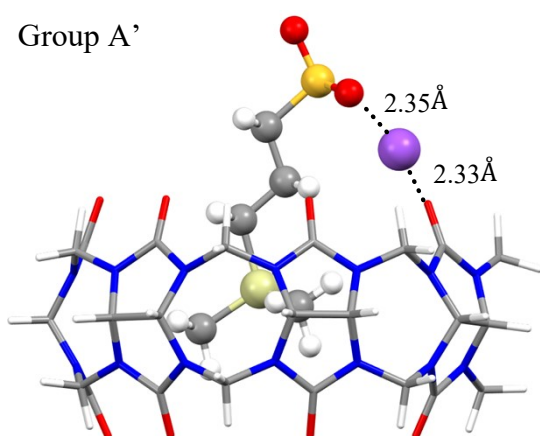

$$E = -60.7 \text{ kJ mol}^{-1}$$

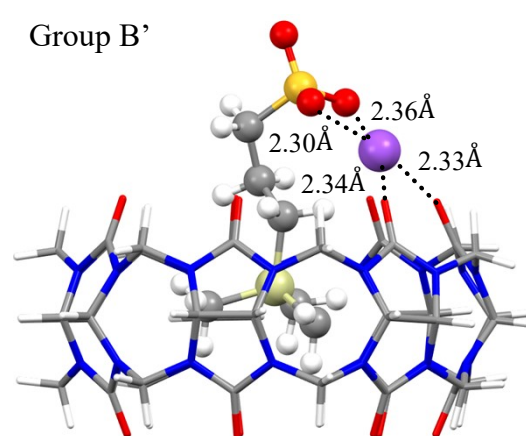

$$E = -56.7 \text{ kJ mol}^{-1}$$

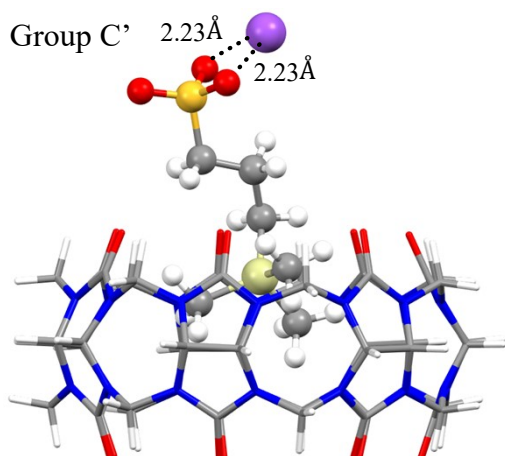

$$E = +30.2 \text{ kJ mol}^{-1}$$

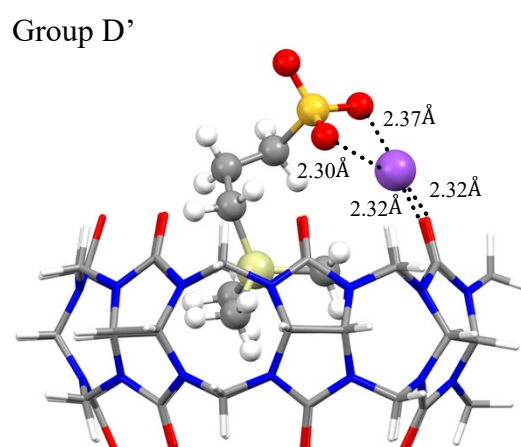

$$E = -54.3 \text{ kJ mol}^{-1}$$

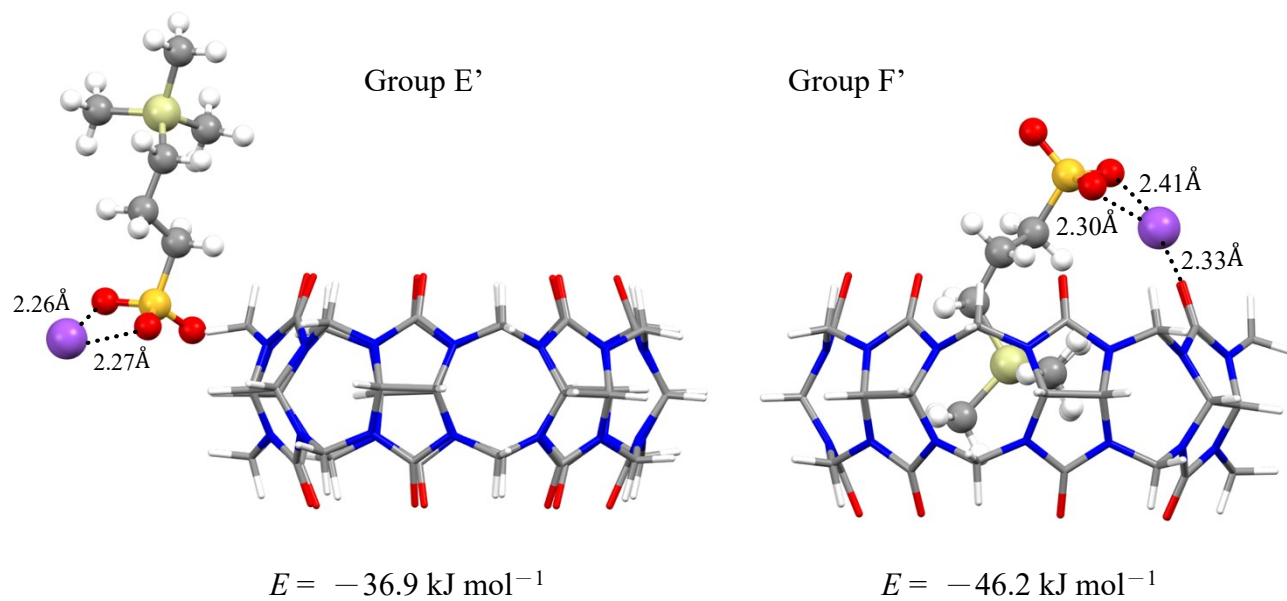

**Fig S13** Optimized structures of inclusion complex of DSS and CB[7].

**Table S4** Atomic coordinates and energies of inclusion complex of DSS and CB[7] (Groups A'–F').

## Inclusion complex of DSS and CB[7] Group A'

$$E_{\text{DSS\_complex\_A'}} = -5525.8723554 \text{ (a.u.)}$$

|   |           |          |           |   |          |           |           |
|---|-----------|----------|-----------|---|----------|-----------|-----------|
| N | 2.221380  | 4.583220 | 0.517679  | O | 1.045448 | -3.983894 | 2.451792  |
| C | 1.955731  | 5.417004 | -0.640550 | C | 0.722173 | -4.725251 | -2.600462 |
| H | 2.608429  | 6.302245 | -0.624455 | O | 0.533718 | -4.355221 | -3.745567 |
| N | 2.030003  | 4.769427 | -1.933220 | N | 2.147286 | -4.611643 | 0.500947  |
| C | 1.121806  | 4.489857 | 1.368213  | C | 1.868668 | -5.437469 | -0.659819 |
| O | 1.111679  | 3.973109 | 2.469713  | H | 2.509159 | -6.331630 | -0.647810 |
| C | 0.801421  | 4.724351 | -2.583524 | N | 1.950165 | -4.786134 | -1.950384 |
| O | 0.608952  | 4.358943 | -3.729445 | C | 3.473965 | -4.260805 | 0.951280  |
| N | 0.056609  | 5.130408 | 0.748433  | H | 3.396066 | -3.991506 | 2.006983  |
| C | 0.433535  | 5.766497 | -0.496554 | H | 4.136704 | -5.131982 | 0.839144  |
| H | 0.239934  | 6.847705 | -0.440402 | C | 3.189588 | -4.500509 | -2.638827 |
| N | -0.155653 | 5.219810 | -1.705744 | H | 2.942833 | -4.352347 | -3.692246 |
| C | -1.202225 | 5.354564 | 1.429424  | H | 3.867032 | -5.359421 | -2.533527 |
| H | -1.063339 | 5.056136 | 2.470814  | N | 4.084602 | -3.128845 | 0.263056  |
| H | -1.443989 | 6.426758 | 1.379344  | C | 4.747047 | -3.252278 | -1.035193 |
| C | -1.502843 | 5.518850 | -2.153544 | H | 5.428808 | -4.113762 | -1.021075 |
| H | -1.535349 | 5.315983 | -3.226174 | N | 3.886456 | -3.310290 | -2.190798 |
| H | -1.711929 | 6.583125 | -1.970539 | C | 4.487750 | -1.994537 | 0.937862  |
| N | -2.323435 | 4.591343 | 0.913847  | O | 4.198990 | -1.693032 | 2.093335  |
| C | -3.110006 | 5.008216 | -0.234279 | C | 3.919172 | -2.141951 | -2.943541 |
| H | -3.355281 | 6.077481 | -0.152766 | O | 3.346023 | -1.948090 | -3.999073 |
| N | -2.545059 | 4.727065 | -1.535699 | N | 5.314598 | -1.264433 | 0.105370  |
| C | -3.011990 | 3.688674 | 1.721132  | C | 5.479284 | -1.879999 | -1.194833 |
| O | -2.669934 | 3.306025 | 2.825789  | H | 6.548232 | -1.976622 | -1.429899 |
| C | -3.279146 | 3.783702 | -2.246763 | N | 4.770524 | -1.249611 | -2.293276 |
| O | -3.096106 | 3.455398 | -3.405296 | C | 5.974199 | -0.044750 | 0.521035  |
| N | -4.178878 | 3.335656 | 1.054198  | H | 6.995282 | -0.052200 | 0.122235  |
| C | -4.368143 | 4.078333 | -0.172882 | H | 6.020175 | -0.047461 | 1.610313  |
| H | -5.317449 | 4.632619 | -0.133829 | C | 5.216572 | -0.031629 | -2.942221 |
| N | -4.288376 | 3.319000 | -1.408052 | H | 4.784845 | -0.025728 | -3.945736 |
| C | -5.190776 | 2.492104 | 1.657828  | H | 6.314750 | -0.041606 | -3.012435 |
| H | -6.164716 | 2.995041 | 1.573750  | N | 5.334737 | 1.187324  | 0.110296  |
| H | -4.925729 | 2.374216 | 2.710780  | C | 5.511085 | 1.805438  | -1.187107 |
| C | -5.378405 | 2.505312 | -1.915944 | H | 6.581759 | 1.884847  | -1.420778 |
| H | -5.227908 | 2.404650 | -2.993025 | N | 4.792646 | 1.191929  | -2.288913 |
| H | -6.329785 | 3.021922 | -1.720598 | C | 4.518434 | 1.927169  | 0.944620  |
| N | -5.296182 | 1.160857 | 1.095330  | O | 4.222739 | 1.625325  | 2.098352  |

|   |           |           |           |    |           |           |           |
|---|-----------|-----------|-----------|----|-----------|-----------|-----------|
| C | -6.057474 | 0.833150  | -0.095859 | C  | 3.959203  | 2.102207  | -2.937281 |
| H | -7.062271 | 1.275668  | -0.030952 | O  | 3.385678  | 1.923301  | -3.995203 |
| N | -5.451432 | 1.167236  | -1.369332 | N  | 4.135164  | 3.070967  | 0.274178  |
| C | -4.950065 | 0.034603  | 1.833319  | C  | 4.802209  | 3.189313  | -1.022290 |
| O | -4.452971 | 0.028102  | 2.944979  | H  | 5.498684  | 4.038816  | -1.002524 |
| C | -5.169795 | 0.045528  | -2.139938 | N  | 3.945474  | 3.267621  | -2.179547 |
| O | -4.779144 | 0.044679  | -3.293845 | C  | 3.542460  | 4.210036  | 0.966455  |
| N | -5.317502 | -1.082363 | 1.091552  | H  | 3.460264  | 3.938534  | 2.021249  |
| C | -6.070846 | -0.736164 | -0.099376 | H  | 4.219002  | 5.070916  | 0.857214  |
| H | -7.083175 | -1.161763 | -0.038302 | C  | 3.266233  | 4.470178  | -2.621617 |
| N | -5.468180 | -1.074634 | -1.373371 | H  | 3.955471  | 5.318833  | -2.510433 |
| C | -5.236773 | -2.417644 | 1.648674  | H  | 3.019042  | 4.331468  | -3.676221 |
| H | -4.972647 | -2.308992 | 2.702841  | C  | -2.079795 | 0.022688  | -0.685819 |
| H | -6.219067 | -2.903029 | 1.559742  | Si | -0.428932 | -0.000330 | 0.230352  |
| C | -5.415312 | -2.411527 | -1.924956 | C  | -0.759895 | -0.014485 | 2.102586  |
| H | -5.261484 | -2.309193 | -3.001413 | C  | 0.487128  | -0.026931 | 3.008930  |
| H | -6.374971 | -2.914021 | -1.733099 | C  | 0.122291  | -0.039094 | 4.498654  |
| N | -4.238252 | -3.276558 | 1.044470  | C  | 0.526536  | -1.534401 | -0.325573 |
| C | -4.434768 | -4.008960 | -0.187442 | C  | 0.554242  | 1.527364  | -0.293658 |
| H | -5.392603 | -4.548790 | -0.154882 | S  | 1.583713  | -0.044202 | 5.592799  |
| N | -4.338793 | -3.243863 | -1.418163 | O  | 1.077734  | -0.051473 | 6.989126  |
| C | -3.075562 | -3.646129 | 1.709518  | O  | 2.380210  | -1.266036 | 5.199833  |
| O | -2.728966 | -3.272552 | 2.815888  | O  | 2.378695  | 1.182756  | 5.212291  |
| C | -3.338355 | -3.724452 | -2.258735 | H  | -1.937127 | 0.036079  | -1.773541 |
| O | -3.148712 | -3.394813 | -3.415790 | H  | -2.670708 | 0.907139  | -0.422166 |
| N | -2.397616 | -4.553106 | 0.897987  | H  | -2.682047 | -0.860846 | -0.445583 |
| C | -3.191012 | -4.957780 | -0.250066 | H  | -1.376515 | 0.862366  | 2.347717  |
| H | -3.452499 | -6.023202 | -0.168759 | H  | -1.384760 | -0.888989 | 2.334501  |
| N | -2.622770 | -4.684723 | -1.551539 | H  | 1.089273  | -0.919301 | 2.792766  |
| C | -1.287148 | -5.333206 | 1.411636  | H  | 1.094537  | 0.865583  | 2.808483  |
| H | -1.143574 | -5.038536 | 2.453464  | H  | -0.457222 | 0.848201  | 4.771651  |
| H | -1.543950 | -6.401856 | 1.359904  | H  | -0.453866 | -0.932678 | 4.757930  |
| C | -1.592174 | -5.490645 | -2.170648 | H  | 1.475760  | -1.652688 | 0.208440  |
| H | -1.622425 | -5.286528 | -3.243103 | H  | 0.751344  | -1.480372 | -1.398817 |
| H | -1.816436 | -6.551863 | -1.988270 | H  | -0.063778 | -2.442045 | -0.158633 |
| N | -0.025793 | -5.125637 | 0.730171  | H  | 0.790871  | 1.485746  | -1.364844 |
| C | 0.341907  | -5.766482 | -0.515187 | H  | -0.025105 | 2.440757  | -0.119847 |
| H | 0.133690  | -6.844976 | -0.459333 | H  | 1.498557  | 1.624291  | 0.253218  |
| N | -0.240525 | -5.211323 | -1.723666 | Na | 3.580360  | -0.032142 | 3.596803  |
| C | 1.048577  | -4.501211 | 1.350532  |    |           |           |           |

# Inclusion complex of DSS and CB[7] Group B'

$$E_{\text{DSS\_complex\_B'}} = -5525.8685632 \text{ (a.u.)}$$

|    |           |           |           |   |           |          |           |
|----|-----------|-----------|-----------|---|-----------|----------|-----------|
| C  | 1.466822  | -0.704145 | -0.802018 | H | 3.914940  | 5.197583 | 1.042337  |
| Si | 0.005313  | -0.112181 | 0.247233  | C | 3.147750  | 4.582902 | -2.517069 |
| C  | 0.456761  | -0.301418 | 2.084743  | H | 2.939887  | 4.422047 | -3.576999 |
| C  | -0.515843 | 0.334075  | 3.101426  | H | 3.808212  | 5.453101 | -2.395779 |
| C  | -0.482298 | -0.237867 | 4.526697  | N | 1.956232  | 4.642488 | 0.578118  |
| C  | -0.341455 | 1.689691  | -0.201040 | C | 1.746219  | 5.493267 | -0.581860 |
| C  | -1.504076 | -1.158198 | -0.192088 | H | 2.398438  | 6.377314 | -0.524665 |
| S  | 1.085256  | -0.082316 | 5.465264  | N | 1.882002  | 4.856988 | -1.873579 |
| O  | 1.735578  | 1.211398  | 5.037290  | C | 0.833814  | 4.605589 | 1.409113  |
| O  | 0.698207  | -0.133828 | 6.900874  | O | 0.787607  | 4.121529 | 2.523735  |
| O  | 1.967819  | -1.228179 | 5.027703  | C | 0.674637  | 4.773300 | -2.560021 |
| H  | 1.247076  | -0.627928 | -1.874433 | O | 0.527187  | 4.389555 | -3.706713 |
| H  | 1.716955  | -1.750139 | -0.591192 | N | -0.198319 | 5.256794 | 0.749075  |
| H  | 2.364978  | -0.102753 | -0.612739 | C | 0.220597  | 5.844624 | -0.504703 |
| H  | 0.589946  | -1.371410 | 2.296861  | H | 0.023820  | 6.926668 | -0.495400 |
| H  | 1.448205  | 0.158675  | 2.195900  | N | -0.319070 | 5.254808 | -1.717094 |
| H  | -0.350432 | 1.415540  | 3.144698  | C | -1.490192 | 5.474155 | 1.370484  |
| H  | -1.555137 | 0.195702  | 2.773792  | H | -1.380071 | 5.237682 | 2.431041  |
| H  | -1.225083 | 0.275389  | 5.144492  | H | -1.761930 | 6.532620 | 1.252132  |
| H  | -0.707610 | -1.309307 | 4.531192  | C | -1.664178 | 5.497479 | -2.200145 |
| H  | -1.094148 | 2.135333  | 0.457350  | H | -1.661760 | 5.285759 | -3.271627 |
| H  | -0.703124 | 1.774847  | -1.233735 | H | -1.920652 | 6.553700 | -2.031270 |
| H  | 0.569095  | 2.293850  | -0.119789 | N | -2.569503 | 4.650093 | 0.863328  |
| H  | -1.806943 | -0.992203 | -1.233766 | C | -3.328971 | 4.953121 | -0.334371 |
| H  | -1.285436 | -2.225807 | -0.076977 | H | -3.662573 | 6.000976 | -0.311361 |
| H  | -2.362650 | -0.925616 | 0.446606  | N | -2.686842 | 4.667390 | -1.601070 |
| Na | 3.274878  | 0.072506  | 3.660372  | C | -3.181018 | 3.679248 | 1.650114  |
| N  | 0.143988  | -5.149853 | 0.694388  | O | -2.845488 | 3.345275 | 2.772187  |
| C  | 0.588954  | -5.736455 | -0.551121 | C | -3.341449 | 3.676967 | -2.322950 |
| H  | 0.436606  | -6.825605 | -0.528989 | O | -3.090923 | 3.334878 | -3.465355 |
| N  | 0.020748  | -5.180467 | -1.765325 | N | -4.270578 | 3.188309 | 0.938820  |
| C  | 1.155725  | -4.466891 | 1.355806  | C | -4.511147 | 3.924800 | -0.286157 |
| O  | 1.090953  | -3.982357 | 2.469514  | H | -5.501255 | 4.402646 | -0.248991 |
| C  | 0.993279  | -4.660841 | -2.613646 | N | -4.365791 | 3.183291 | -1.523268 |
| O  | 0.827916  | -4.293380 | -3.762847 | C | -5.227948 | 2.282503 | 1.541425  |
| N  | 2.279200  | -4.467568 | 0.526224  | H | -4.951943 | 2.177379 | 2.592905  |
| C  | 2.097638  | -5.324248 | -0.633606 | H | -6.232862 | 2.723303 | 1.463479  |
| H  | 2.785686  | -6.181010 | -0.579937 | C | -5.376978 | 2.290030 | -2.050815 |
| N  | 2.202242  | -4.681321 | -1.924425 | H | -5.190255 | 2.189444 | -3.122198 |
| C  | 3.579695  | -4.106729 | 1.049648  | H | -6.368205 | 2.738272 | -1.887026 |

|   |          |           |           |   |           |           |           |
|---|----------|-----------|-----------|---|-----------|-----------|-----------|
| H | 3.443562 | -3.841725 | 2.100624  | N | -5.256272 | 0.949422  | 0.971611  |
| H | 4.255732 | -4.971652 | 0.969641  | C | -5.990549 | 0.602624  | -0.229814 |
| C | 3.456990 | -4.336280 | -2.557600 | H | -7.006720 | 1.021169  | -0.182748 |
| H | 3.246859 | -4.181282 | -3.617973 | N | -5.367559 | 0.955431  | -1.489482 |
| H | 4.161066 | -5.171616 | -2.436772 | C | -4.889732 | -0.169785 | 1.711820  |
| N | 4.207995 | -2.968090 | 0.397658  | O | -4.393530 | -0.164832 | 2.824663  |
| C | 4.912169 | -3.056027 | -0.880167 | C | -5.049781 | -0.158239 | -2.258421 |
| H | 5.619296 | -3.896630 | -0.854978 | O | -4.644158 | -0.147357 | -3.407412 |
| N | 4.089329 | -3.126973 | -2.064790 | N | -5.228798 | -1.295155 | 0.968490  |
| C | 4.528185 | -1.817762 | 1.087579  | C | -5.965709 | -0.964325 | -0.235365 |
| O | 4.183886 | -1.535164 | 2.231824  | H | -6.967936 | -1.415824 | -0.196820 |
| C | 4.140106 | -1.961692 | -2.822913 | N | -5.327093 | -1.285899 | -1.495565 |
| O | 3.613843 | -1.783692 | -3.905302 | C | -5.133771 | -2.634146 | 1.518209  |
| N | 5.349428 | -1.046919 | 0.287112  | H | -6.109083 | -3.130312 | 1.411929  |
| C | 5.608814 | -1.658575 | -1.001043 | H | -4.886886 | -2.529060 | 2.576895  |
| H | 6.692490 | -1.721658 | -1.171184 | C | -5.263397 | -2.619832 | -2.054954 |
| N | 4.949365 | -1.055139 | -2.143124 | H | -5.098558 | -2.510099 | -3.129051 |
| C | 5.934388 | 0.197126  | 0.739202  | H | -6.222926 | -3.126706 | -1.876226 |
| H | 6.970510 | 0.243370  | 0.384042  | N | -4.114230 | -3.476560 | 0.926400  |
| H | 5.932794 | 0.186736  | 1.829624  | C | -4.273730 | -4.212849 | -0.311812 |
| C | 5.357701 | 0.195259  | -2.751127 | H | -5.212645 | -4.785133 | -0.288578 |
| H | 4.986296 | 0.188506  | -3.778461 | N | -4.192167 | -3.448767 | -1.541980 |
| H | 6.456418 | 0.251884  | -2.755645 | C | -2.969387 | -3.841420 | 1.623599  |
| N | 5.252668 | 1.400675  | 0.310397  | O | -2.658554 | -3.473870 | 2.742353  |
| C | 5.450364 | 2.034595  | -0.975840 | C | -3.130043 | -3.842095 | -2.346185 |
| H | 6.524027 | 2.180041  | -1.159030 | O | -2.914683 | -3.473326 | -3.487446 |
| N | 4.823384 | 1.385521  | -2.113190 | N | -2.264027 | -4.740860 | 0.829437  |
| C | 4.356882 | 2.085788  | 1.109122  | C | -2.995688 | -5.120325 | -0.364199 |
| O | 4.029690 | 1.763961  | 2.248433  | H | -3.225052 | -6.195752 | -0.338943 |
| C | 3.975975 | 2.252855  | -2.802352 | N | -2.385413 | -4.773786 | -1.632245 |
| O | 3.476973 | 2.053968  | -3.893770 | C | -1.117220 | -5.464133 | 1.338448  |
| N | 3.932052 | 3.206389  | 0.422364  | H | -1.015260 | -5.200354 | 2.393382  |
| C | 4.652248 | 3.371687  | -0.840104 | H | -1.300269 | -6.544117 | 1.241155  |
| H | 5.294921 | 4.261329  | -0.785094 | C | -1.305809 | -5.515291 | -2.248359 |
| N | 3.845556 | 3.405935  | -2.034930 | H | -1.481666 | -6.590621 | -2.095910 |
| C | 3.263710 | 4.311432  | 1.098872  | H | -1.323845 | -5.286808 | -3.316211 |
| H | 3.130357 | 4.019074  | 2.142834  |   |           |           |           |

# Inclusion complex of DSS and CB[7] Group C'

$$E_{\text{DSS\_complex\_C'}} = -5525.8346543 \text{ (a.u.)}$$

|    |           |           |           |   |           |           |           |
|----|-----------|-----------|-----------|---|-----------|-----------|-----------|
| C  | -1.415556 | -0.940239 | 0.039901  | H | -3.111591 | -6.002207 | -2.259703 |
| Si | -0.050652 | -0.247711 | 1.163512  | C | -2.195033 | -5.278772 | 1.169701  |
| C  | -0.029597 | -1.243839 | 2.785773  | H | -1.943822 | -5.136883 | 2.223019  |
| C  | 0.520316  | -0.609854 | 4.085282  | H | -2.631767 | -6.277406 | 1.023600  |
| C  | 2.049656  | -0.510836 | 4.153215  | N | -3.532404 | -4.065472 | -1.607476 |
| C  | 1.561304  | -0.394310 | 0.185571  | C | -4.089240 | -4.377801 | -0.303343 |
| C  | -0.428567 | 1.563881  | 1.513349  | H | -4.559384 | -5.372166 | -0.324719 |
| S  | 2.655308  | -0.243616 | 5.849586  | N | -3.190582 | -4.281991 | 0.827977  |
| O  | 2.162631  | -1.424263 | 6.677352  | C | -4.199952 | -3.015377 | -2.228790 |
| O  | 4.128779  | -0.126280 | 5.794123  | O | -4.067590 | -2.663649 | -3.387629 |
| O  | 1.949541  | 0.993866  | 6.383556  | C | -3.533131 | -3.248735 | 1.692741  |
| H  | -1.406357 | -0.432850 | -0.933905 | O | -3.032587 | -3.027128 | 2.781440  |
| H  | -2.412386 | -0.801134 | 0.471445  | N | -5.086006 | -2.476966 | -1.304048 |
| H  | -1.282145 | -2.012436 | -0.152075 | C | -5.112508 | -3.215357 | -0.060795 |
| H  | -1.081239 | -1.500529 | 2.973096  | H | -6.133775 | -3.570758 | 0.141244  |
| H  | 0.466634  | -2.208628 | 2.618824  | N | -4.581391 | -2.542839 | 1.112591  |
| H  | 0.087831  | 0.384978  | 4.242644  | C | -6.044075 | -1.453779 | -1.667725 |
| H  | 0.189149  | -1.237695 | 4.923653  | H | -6.040799 | -1.379970 | -2.757336 |
| H  | 2.534968  | -1.433716 | 3.821071  | H | -7.039275 | -1.763285 | -1.319040 |
| H  | 2.459106  | 0.314797  | 3.563578  | C | -5.275476 | -1.491009 | 1.829460  |
| H  | 2.429149  | -0.218059 | 0.824927  | H | -4.833641 | -1.440966 | 2.827066  |
| H  | 1.588380  | 0.331018  | -0.638891 | H | -6.341617 | -1.752440 | 1.909748  |
| H  | 1.661181  | -1.393973 | -0.254752 | N | -5.757103 | -0.131103 | -1.155430 |
| H  | -0.585846 | 2.113627  | 0.575189  | C | -6.050075 | 0.308697  | 0.191302  |
| H  | -1.337944 | 1.660069  | 2.116421  | H | -7.092904 | 0.068886  | 0.446291  |
| H  | 0.376167  | 2.068828  | 2.059235  | N | -5.164038 | -0.168175 | 1.239200  |
| Na | 0.836352  | -0.147034 | 7.937215  | C | -5.346561 | 0.906181  | -1.982802 |
| N  | 4.316717  | 2.534599  | -2.547743 | O | -5.150930 | 0.836490  | -3.183286 |
| C  | 5.179070  | 2.364096  | -1.395094 | C | -4.535076 | 0.878631  | 1.910608  |
| H  | 6.027950  | 3.061208  | -1.455750 | O | -3.876856 | 0.784041  | 2.931672  |
| N  | 4.547319  | 2.464709  | -0.094890 | N | -5.251344 | 2.050574  | -1.199153 |
| C  | 4.249488  | 1.392816  | -3.337416 | C | -5.762753 | 1.847737  | 0.143067  |
| O  | 3.723933  | 1.305280  | -4.433325 | H | -6.661162 | 2.462793  | 0.300158  |
| C  | 4.621616  | 1.276458  | 0.623636  | N | -4.827528 | 2.055323  | 1.229247  |
| O  | 4.304569  | 1.122867  | 1.789443  | C | -5.043313 | 3.354746  | -1.792036 |
| N  | 4.934505  | 0.384076  | -2.671760 | H | -5.018958 | 3.211433  | -2.874470 |
| C  | 5.607765  | 0.857877  | -1.479151 | H | -5.882075 | 4.013658  | -1.523287 |
| H  | 6.694203  | 0.720626  | -1.583767 | C | -4.470914 | 3.362470  | 1.749602  |
| N  | 5.159758  | 0.306668  | -0.215243 | H | -4.113449 | 3.223879  | 2.772173  |
| C  | 5.182644  | -0.902121 | -3.287794 | H | -5.374271 | 3.990665  | 1.756588  |

|   |           |           |           |   |           |          |           |
|---|-----------|-----------|-----------|---|-----------|----------|-----------|
| H | 4.850897  | -0.828547 | -4.325750 | N | -3.806613 | 4.003764 | -1.413128 |
| H | 6.261258  | -1.112441 | -3.256278 | C | -3.633585 | 4.782724 | -0.207467 |
| C | 5.523868  | -1.010488 | 0.272927  | H | -4.481155 | 5.473761 | -0.084898 |
| H | 5.400097  | -0.997593 | 1.358184  | N | -3.414897 | 4.044592 | 1.024958  |
| H | 6.578407  | -1.199725 | 0.022805  | C | -2.755234 | 4.159322 | -2.306939 |
| N | 4.474542  | -2.014002 | -2.689443 | O | -2.701487 | 3.711998 | -3.439278 |
| C | 4.928943  | -2.739170 | -1.522009 | C | -2.236141 | 4.434007 | 1.658113  |
| H | 5.989886  | -3.005677 | -1.638120 | O | -1.923541 | 4.190701 | 2.809226  |
| N | 4.716471  | -2.105772 | -0.232735 | N | -1.797416 | 4.960358 | -1.693598 |
| C | 3.416646  | -2.641727 | -3.333871 | C | -2.268248 | 5.515498 | -0.437519 |
| O | 2.926028  | -2.313488 | -4.400016 | H | -2.372794 | 6.607137 | -0.529192 |
| C | 3.923139  | -2.878137 | 0.609150  | N | -1.504203 | 5.191323 | 0.748923  |
| O | 3.728466  | -2.685752 | 1.796025  | C | -0.709599 | 5.535660 | -2.457493 |
| N | 3.053180  | -3.743552 | -2.567095 | H | -0.765110 | 6.633179 | -2.387942 |
| C | 3.979123  | -3.984892 | -1.475282 | H | -0.841931 | 5.225384 | -3.496300 |
| H | 4.505285  | -4.938052 | -1.633363 | C | -0.233397 | 5.798730 | 1.095351  |
| N | 3.425478  | -3.941141 | -0.138680 | H | -0.076500 | 5.619619 | 2.161182  |
| C | 2.138528  | -4.743533 | -3.078711 | H | -0.289651 | 6.880223 | 0.905292  |
| H | 2.647843  | -5.718851 | -3.101909 | N | 0.607637  | 5.100578 | -2.047061 |
| H | 1.870635  | -4.443457 | -4.094114 | C | 1.330203  | 5.682086 | -0.930493 |
| C | 2.672607  | -5.022523 | 0.464902  | H | 1.309752  | 6.779825 | -1.001131 |
| H | 2.715852  | -4.883158 | 1.547207  | N | 0.921148  | 5.265718 | 0.394365  |
| H | 3.147655  | -5.977161 | 0.194719  | C | 1.443899  | 4.411879 | -2.918553 |
| N | 0.905774  | -4.878184 | -2.331565 | O | 1.139195  | 3.974420 | -4.014619 |
| C | 0.778169  | -5.672537 | -1.127564 | C | 1.900756  | 4.516361 | 1.038837  |
| H | 1.246457  | -6.656961 | -1.276913 | O | 1.885762  | 4.163619 | 2.204086  |
| N | 1.268263  | -5.074235 | 0.099628  | N | 2.702111  | 4.356558 | -2.333261 |
| C | -0.325870 | -4.550203 | -2.886886 | C | 2.767274  | 5.078912 | -1.081981 |
| O | -0.509476 | -4.014609 | -3.965844 | H | 3.556738  | 5.843561 | -1.131881 |
| C | 0.260913  | -4.920470 | 1.047085  | N | 2.923824  | 4.281634 | 0.122299  |
| O | 0.416835  | -4.632476 | 2.220363  | C | 3.852272  | 3.819126 | -3.029036 |
| N | -1.310545 | -4.988321 | -2.008824 | H | 3.564069  | 3.682854 | -4.073609 |
| C | -0.770349 | -5.752438 | -0.903945 | H | 4.674419  | 4.546047 | -2.962228 |
| H | -1.160757 | -6.780747 | -0.933176 | C | 4.194218  | 3.717950 | 0.541847  |
| N | -0.952443 | -5.193548 | 0.422461  | H | 4.993726  | 4.449875 | 0.350463  |
| C | -2.711998 | -4.982780 | -2.371162 | H | 4.119457  | 3.526444 | 1.614563  |
| H | -2.775187 | -4.674541 | -3.417072 |   |           |          |           |



# Inclusion complex of DSS and CB[7] Group D'

$$E_{\text{DSS\_complex\_D'}} = -5525.860217 \text{ (a.u.)}$$

|    |           |           |           |   |           |          |           |
|----|-----------|-----------|-----------|---|-----------|----------|-----------|
| C  | 1.065227  | 1.487110  | -0.008574 | H | 6.239842  | 2.705819 | 1.503595  |
| Si | 0.393752  | 0.119661  | 1.118766  | C | 5.356526  | 2.404555 | -2.000890 |
| C  | 0.945626  | 0.413117  | 2.914003  | H | 5.172077  | 2.346915 | -3.075857 |
| C  | 0.963149  | -0.758307 | 3.922673  | H | 6.350099  | 2.839878 | -1.817268 |
| C  | -0.379271 | -1.399218 | 4.296429  | N | 4.278324  | 3.218995 | 1.024222  |
| C  | -1.493219 | 0.144647  | 0.958130  | C | 4.498628  | 3.987672 | -0.183976 |
| C  | 1.021441  | -1.514102 | 0.404321  | H | 5.484459  | 4.474229 | -0.144561 |
| S  | -1.496229 | -0.416102 | 5.350415  | N | 4.346631  | 3.280218 | -1.441944 |
| O  | -0.858086 | -0.281837 | 6.685167  | C | 3.172827  | 3.662698 | 1.742227  |
| O  | -1.730478 | 0.890769  | 4.631587  | O | 2.847910  | 3.297766 | 2.857358  |
| O  | -2.796305 | -1.194132 | 5.350341  | C | 3.344596  | 3.823650 | -2.238045 |
| H  | 0.716661  | 1.337834  | -1.039336 | O | 3.113654  | 3.538474 | -3.399776 |
| H  | 2.161347  | 1.482884  | -0.033721 | N | 2.532839  | 4.630343 | 0.974987  |
| H  | 0.744081  | 2.484756  | 0.305543  | C | 3.306648  | 5.007608 | -0.194213 |
| H  | 1.970031  | 0.802630  | 2.862821  | H | 3.631275  | 6.054976 | -0.106926 |
| H  | 0.337538  | 1.237527  | 3.306101  | N | 2.689179  | 4.790459 | -1.485576 |
| H  | 1.576456  | -1.576207 | 3.527093  | C | 1.403591  | 5.380497 | 1.487349  |
| H  | 1.457224  | -0.427163 | 4.846084  | H | 1.263671  | 5.071701 | 2.525685  |
| H  | -0.965749 | -1.672584 | 3.416219  | H | 1.634967  | 6.455019 | 1.447576  |
| H  | -0.217390 | -2.320877 | 4.864421  | C | 1.688448  | 5.658107 | -2.068693 |
| H  | -1.946169 | -0.735251 | 1.427408  | H | 1.723366  | 5.513498 | -3.150669 |
| H  | -1.802997 | 0.154736  | -0.095690 | H | 1.938895  | 6.700580 | -1.824945 |
| H  | -1.896281 | 1.040027  | 1.443983  | N | 0.144419  | 5.155133 | 0.796308  |
| H  | 0.614229  | -1.680355 | -0.601951 | C | -0.246839 | 5.861581 | -0.407273 |
| H  | 2.114194  | -1.518953 | 0.319784  | H | -0.052636 | 6.937748 | -0.288751 |
| H  | 0.728626  | -2.359307 | 1.032596  | N | 0.327388  | 5.389601 | -1.651314 |
| Na | -3.608648 | 0.124060  | 3.561418  | C | -0.928595 | 4.518422 | 1.410789  |
| N  | -2.229617 | -4.441718 | 0.354006  | O | -0.921121 | 3.979040 | 2.500552  |
| C  | -2.068844 | -5.329268 | -0.788784 | C | -0.630963 | 4.918675 | -2.538637 |
| H  | -2.770476 | -6.172692 | -0.709887 | O | -0.448789 | 4.601929 | -3.700531 |
| N  | -2.168945 | -4.717569 | -2.093778 | N | -2.035323 | 4.639960 | 0.566441  |
| C  | -1.108422 | -4.465575 | 1.186260  | C | -1.769164 | 5.520948 | -0.556764 |
| O  | -1.036062 | -3.969738 | 2.296631  | H | -2.419188 | 6.406830 | -0.501656 |
| C  | -0.957649 | -4.706360 | -2.777926 | N | -1.852248 | 4.923078 | -1.871716 |
| O  | -0.787304 | -4.351031 | -3.930260 | C | -3.368117 | 4.331532 | 1.039390  |
| N  | -0.111694 | -5.183554 | 0.541176  | H | -3.283848 | 4.036393 | 2.087433  |
| C  | -0.566518 | -5.764610 | -0.704213 | H | -3.995676 | 5.232170 | 0.958777  |
| H  | -0.431001 | -6.855715 | -0.678724 | C | -3.094749 | 4.646475 | -2.555353 |
| N  | 0.007224  | -5.220645 | -1.920836 | H | -2.852943 | 4.508460 | -3.611316 |
| C  | 1.148353  | -5.521799 | 1.183942  | H | -3.773716 | 5.503148 | -2.438923 |

|   |          |           |           |   |           |           |           |
|---|----------|-----------|-----------|---|-----------|-----------|-----------|
| H | 1.046192 | -5.288448 | 2.245905  | N | -4.032786 | 3.237473  | 0.339960  |
| H | 1.317809 | -6.600610 | 1.057809  | C | -4.667186 | 3.397021  | -0.969533 |
| C | 1.343034 | -5.533798 | -2.387844 | H | -5.328238 | 4.274688  | -0.954176 |
| H | 1.364959 | -5.310446 | -3.456729 | N | -3.787012 | 3.452224  | -2.109777 |
| H | 1.541108 | -6.603746 | -2.228193 | C | -4.520018 | 2.132127  | 1.007362  |
| N | 2.308694 | -4.796249 | 0.705201  | O | -4.319829 | 1.846681  | 2.185907  |
| C | 3.033287 | -5.121640 | -0.510785 | C | -3.839052 | 2.297218  | -2.881664 |
| H | 3.299348 | -6.188847 | -0.514723 | O | -3.260525 | 2.107786  | -3.935143 |
| N | 2.398688 | -4.767999 | -1.762261 | N | -5.316879 | 1.412855  | 0.136657  |
| C | 3.024234 | -3.934671 | 1.529949  | C | -5.430809 | 2.046298  | -1.161395 |
| O | 2.747470 | -3.642905 | 2.680320  | H | -6.491084 | 2.175034  | -1.420173 |
| C | 3.083147 | -3.773138 | -2.449057 | N | -4.715583 | 1.413360  | -2.254040 |
| O | 2.833147 | -3.375062 | -3.573095 | C | -6.000669 | 0.192088  | 0.513760  |
| N | 4.137639 | -3.500175 | 0.821326  | H | -7.013688 | 0.218253  | 0.095710  |
| C | 4.281215 | -4.172988 | -0.453832 | H | -6.067624 | 0.174655  | 1.601905  |
| H | 5.238448 | -4.713759 | -0.487108 | C | -5.187759 | 0.224281  | -2.935758 |
| N | 4.135253 | -3.353519 | -1.643218 | H | -4.751276 | 0.230242  | -3.937213 |
| C | 5.143527 | -2.642472 | 1.417433  | H | -6.285161 | 0.263329  | -3.010930 |
| H | 6.130997 | -3.107309 | 1.283617  | N | -5.367684 | -1.041182 | 0.089026  |
| H | 4.911428 | -2.570467 | 2.482146  | C | -5.534210 | -1.637323 | -1.219475 |
| C | 5.184335 | -2.501947 | -2.167417 | H | -6.602965 | -1.701017 | -1.466959 |
| H | 4.982104 | -2.357529 | -3.230983 | N | -4.794886 | -1.021510 | -2.307423 |
| H | 6.152486 | -3.008828 | -2.038965 | C | -4.557102 | -1.799027 | 0.913461  |
| N | 5.190353 | -1.286890 | 0.895964  | O | -4.288597 | -1.534852 | 2.082379  |
| C | 5.915562 | -0.916935 | -0.304463 | C | -4.006719 | -1.948935 | -2.986997 |
| H | 6.914448 | -1.377997 | -0.294782 | O | -3.446805 | -1.773457 | -4.052751 |
| N | 5.257343 | -1.188455 | -1.565485 | N | -4.142664 | -2.914929 | 0.210953  |
| C | 4.892504 | -0.182706 | 1.691298  | C | -4.843857 | -3.030401 | -1.069697 |
| O | 4.448521 | -0.213474 | 2.824750  | H | -5.553269 | -3.868551 | -1.029165 |
| C | 4.997487 | -0.032682 | -2.293069 | N | -4.019015 | -3.126440 | -2.247169 |
| O | 4.587754 | 0.020372  | -3.439229 | C | -3.525375 | -4.055403 | 0.877084  |
| N | 5.227652 | 0.960989  | 0.970199  | H | -3.387457 | -3.780629 | 1.925023  |
| C | 5.956251 | 0.647512  | -0.245044 | H | -4.210939 | -4.914419 | 0.809642  |
| H | 6.977069 | 1.053284  | -0.184525 | C | -3.413711 | -4.352459 | -2.730982 |
| N | 5.337891 | 1.050007  | -1.490620 | H | -4.137745 | -5.169076 | -2.604608 |
| C | 5.229350 | 2.278744  | 1.583162  | H | -3.197882 | -4.211773 | -3.792172 |
| H | 4.968491 | 2.144434  | 2.635163  |   |           |           |           |

# Inclusion complex of DSS and CB[7] Group E'

$$E_{DSS\_complex\_E'} = -5525.8650615 \text{ (a.u.)}$$

|    |           |           |           |   |           |           |           |
|----|-----------|-----------|-----------|---|-----------|-----------|-----------|
| C  | 8.973156  | -0.021173 | 6.054440  | H | -7.627854 | 0.453469  | 3.287422  |
| Si | 9.112867  | -0.481235 | 4.219987  | C | -7.418383 | 0.423208  | -0.353987 |
| C  | 8.183889  | 0.869339  | 3.237396  | H | -7.443008 | 0.420443  | -1.445926 |
| C  | 8.300192  | 0.905330  | 1.696305  | H | -8.443419 | 0.497343  | 0.040045  |
| C  | 7.509989  | -0.212704 | 1.013578  | N | -6.258087 | -0.875237 | 2.457465  |
| C  | 10.938562 | -0.500668 | 3.707114  | C | -7.053106 | -1.419672 | 1.377671  |
| C  | 8.373864  | -2.213206 | 3.977694  | H | -8.120553 | -1.380276 | 1.639531  |
| S  | 7.587150  | -0.169496 | -0.801237 | N | -6.842394 | -0.838749 | 0.063681  |
| O  | 9.046123  | -0.271130 | -1.182531 | C | -5.330467 | -1.784425 | 2.951415  |
| O  | 6.739953  | -1.287086 | -1.280084 | O | -4.615726 | -1.625924 | 3.925294  |
| O  | 7.090146  | 1.199152  | -1.242831 | C | -6.413519 | -1.778952 | -0.867658 |
| H  | 9.497145  | -0.749556 | 6.686685  | O | -6.313960 | -1.607667 | -2.070004 |
| H  | 7.925815  | 0.005953  | 6.382263  | N | -5.400551 | -2.925885 | 2.159666  |
| H  | 9.408523  | 0.965852  | 6.256808  | C | -6.506514 | -2.879012 | 1.219864  |
| H  | 7.121467  | 0.848902  | 3.524338  | H | -7.247430 | -3.651569 | 1.472247  |
| H  | 8.567549  | 1.825440  | 3.625637  | N | -6.164344 | -2.962006 | -0.183795 |
| H  | 7.921665  | 1.866975  | 1.326985  | C | -4.727756 | -4.150765 | 2.544892  |
| H  | 9.352589  | 0.841796  | 1.393512  | H | -4.245254 | -3.961689 | 3.506324  |
| H  | 7.879841  | -1.207802 | 1.276446  | H | -5.474032 | -4.951516 | 2.655139  |
| H  | 6.444432  | -0.169108 | 1.263868  | C | -5.826186 | -4.190957 | -0.871039 |
| H  | 11.065224 | -0.775343 | 2.652145  | H | -5.991253 | -4.021526 | -1.937267 |
| H  | 11.504853 | -1.226960 | 4.304467  | H | -6.493575 | -4.988549 | -0.514041 |
| H  | 11.406924 | 0.481515  | 3.852236  | N | -3.699631 | -4.593745 | 1.628164  |
| H  | 8.809678  | -2.914864 | 4.701255  | C | -3.957502 | -5.360763 | 0.426959  |
| H  | 7.287336  | -2.215278 | 4.132107  | H | -4.634085 | -6.197802 | 0.653486  |
| H  | 8.568905  | -2.619019 | 2.977520  | N | -4.450999 | -4.620532 | -0.718493 |
| Na | 9.064389  | 1.725523  | -2.234283 | C | -2.353274 | -4.576047 | 1.973381  |
| N  | 2.926064  | 3.034555  | -0.362347 | O | -1.879305 | -4.108873 | 2.994358  |
| C  | 2.696247  | 3.786753  | -1.575767 | C | -3.582812 | -4.678272 | -1.803752 |
| H  | 3.639881  | 4.227009  | -1.928815 | O | -3.816758 | -4.285190 | -2.932881 |
| N  | 2.040984  | 3.082013  | -2.667239 | N | -1.654625 | -5.228944 | 0.965936  |
| C  | 2.126581  | 3.454008  | 0.688247  | C | -2.529977 | -5.821870 | -0.025646 |
| O  | 2.171640  | 3.051281  | 1.838363  | H | -2.406492 | -6.914739 | -0.030261 |
| C  | 0.861965  | 3.703107  | -3.060471 | N | -2.419297 | -5.306679 | -1.375753 |
| O  | 0.202928  | 3.441361  | -4.052166 | C | -0.248295 | -5.548499 | 1.097172  |
| N  | 1.290398  | 4.459502  | 0.206844  | H | 0.050438  | -5.278108 | 2.112415  |
| C  | 1.632659  | 4.854424  | -1.148137 | H | -0.114934 | -6.630542 | 0.946565  |
| H  | 2.020726  | 5.883635  | -1.154279 | C | -1.369200 | -5.683011 | -2.302870 |
| N  | 0.591899  | 4.711768  | -2.142912 | H | -1.742603 | -5.476813 | -3.308216 |
| C  | 0.526000  | 5.291207  | 1.112041  | H | -1.167418 | -6.757907 | -2.194639 |

|   |           |          |           |   |           |           |           |
|---|-----------|----------|-----------|---|-----------|-----------|-----------|
| H | 0.770794  | 4.972251 | 2.127634  | N | 0.623710  | -4.829863 | 0.190940  |
| H | 0.819917  | 6.342631 | 0.971806  | C | 0.892187  | -5.260539 | -1.170807 |
| C | -0.528614 | 5.613648 | -2.298182 | H | 1.126672  | -6.335041 | -1.187326 |
| H | -0.919133 | 5.469773 | -3.307880 | N | -0.125087 | -4.960163 | -2.153538 |
| H | -0.170704 | 6.646180 | -2.181581 | C | 1.617212  | -3.981556 | 0.676440  |
| N | -0.911094 | 5.182640 | 0.965887  | O | 1.739650  | -3.610103 | 1.831230  |
| C | -1.677668 | 5.909217 | -0.028195 | C | 0.270557  | -3.976424 | -3.051478 |
| H | -1.392095 | 6.971338 | -0.020280 | O | -0.357866 | -3.602661 | -4.026956 |
| N | -1.631581 | 5.395718 | -1.381818 | N | 2.464253  | -3.681004 | -0.378194 |
| C | -1.708111 | 4.665142 | 1.979297  | C | 2.095494  | -4.355512 | -1.602931 |
| O | -1.317702 | 4.143529 | 3.009231  | H | 2.952424  | -4.925026 | -1.990551 |
| C | -2.863254 | 4.920071 | -1.814673 | N | 1.529592  | -3.532444 | -2.662983 |
| O | -3.139952 | 4.558081 | -2.944574 | C | 3.631982  | -2.834433 | -0.215583 |
| N | -3.033061 | 4.893308 | 1.627094  | H | 4.491633  | -3.316715 | -0.699894 |
| C | -3.162249 | 5.662840 | 0.407864  | H | 3.815669  | -2.744729 | 0.856708  |
| H | -3.717723 | 6.591175 | 0.606370  | C | 2.337882  | -2.727062 | -3.564263 |
| N | -3.737440 | 4.975131 | -0.733469 | H | 1.756085  | -2.587742 | -4.477979 |
| C | -4.125744 | 4.607367 | 2.531235  | H | 3.265545  | -3.273556 | -3.792733 |
| H | -4.755779 | 5.504492 | 2.620050  | N | 3.481178  | -1.494820 | -0.741788 |
| H | -3.688013 | 4.366527 | 3.502431  | C | 3.757082  | -1.167165 | -2.129372 |
| C | -5.158456 | 4.746181 | -0.901655 | H | 4.679497  | -1.665360 | -2.450018 |
| H | -5.332444 | 4.587603 | -1.968163 | N | 2.676011  | -1.416730 | -3.064151 |
| H | -5.709183 | 5.636223 | -0.563936 | C | 3.591331  | -0.382746 | 0.082679  |
| N | -4.956049 | 3.481797 | 2.149466  | O | 3.641841  | -0.391639 | 1.303666  |
| C | -6.045392 | 3.574874 | 1.194585  | C | 2.199110  | -0.254483 | -3.653207 |
| H | -6.674067 | 4.447157 | 1.425712  | O | 1.386764  | -0.185857 | -4.562458 |
| N | -5.677147 | 3.587708 | -0.205246 | N | 3.665777  | 0.739061  | -0.730452 |
| C | -5.047288 | 2.346631 | 2.948063  | C | 3.882299  | 0.388163  | -2.122636 |
| O | -4.371946 | 2.101788 | 3.932073  | H | 4.870065  | 0.743564  | -2.440901 |
| C | -6.096853 | 2.448930 | -0.880908 | N | 2.852581  | 0.813954  | -3.053691 |
| O | -6.014067 | 2.251969 | -2.080680 | C | 3.975781  | 2.046615  | -0.190659 |
| N | -6.080494 | 1.564063 | 2.446321  | H | 4.126059  | 1.924616  | 0.883683  |
| C | -6.793275 | 2.208841 | 1.363521  | H | 4.899537  | 2.413694  | -0.654738 |
| H | -7.854824 | 2.323223 | 1.627527  | C | 2.731946  | 2.162573  | -3.554879 |
| N | -6.671076 | 1.594624 | 0.054346  | H | 3.737740  | 2.557487  | -3.762634 |
| C | -6.542582 | 0.374511 | 3.131743  | H | 2.153465  | 2.117218  | -4.480153 |
| H | -6.032518 | 0.342169 | 4.096882  |   |           |           |           |

# Inclusion complex of DSS and CB[7] Group F'

$$E_{\text{DSS\_complex\_F'}} = -5525.8617108 \text{ (a.u.)}$$

|    |           |           |           |   |           |           |           |
|----|-----------|-----------|-----------|---|-----------|-----------|-----------|
| C  | 1.829674  | -0.114658 | -0.970595 | H | 1.271586  | -6.623091 | -2.111709 |
| Si | 0.467015  | -0.023893 | 0.339328  | C | 0.893489  | -5.459285 | 1.312281  |
| C  | 1.313244  | -0.081174 | 2.041496  | H | 0.789566  | -5.189124 | 2.365347  |
| C  | 0.541097  | 0.279131  | 3.330923  | H | 1.077088  | -6.540259 | 1.222963  |
| C  | -0.427408 | -0.816261 | 3.778382  | N | -0.192078 | -5.171014 | -1.795152 |
| C  | -0.489388 | 1.587324  | 0.098759  | C | -0.798842 | -5.715321 | -0.593960 |
| C  | -0.715249 | -1.462379 | 0.009942  | H | -0.675923 | -6.808157 | -0.574382 |
| S  | -1.426647 | -0.357682 | 5.239788  | N | -0.364870 | -5.145911 | 0.664803  |
| O  | -0.563413 | -0.449614 | 6.444334  | C | -1.127928 | -4.594793 | -2.646074 |
| O  | -1.943961 | 1.030900  | 4.939244  | O | -0.929275 | -4.215665 | -3.786325 |
| O  | -2.599493 | -1.310621 | 5.220311  | C | -1.382893 | -4.469732 | 1.325513  |
| H  | 1.417090  | -0.117256 | -1.986631 | O | -1.330009 | -4.008891 | 2.450361  |
| H  | 2.428458  | -1.026880 | -0.861924 | N | -2.347432 | -4.575433 | -1.976836 |
| H  | 2.514319  | 0.738670  | -0.899112 | C | -2.296833 | -5.263635 | -0.704074 |
| H  | 1.787544  | -1.064112 | 2.168567  | H | -3.005104 | -6.105376 | -0.703262 |
| H  | 2.148073  | 0.628633  | 1.967438  | N | -2.492002 | -4.449404 | 0.482099  |
| H  | 1.268096  | 0.453989  | 4.132959  | C | -3.573041 | -4.198590 | -2.646505 |
| H  | -0.005838 | 1.219356  | 3.203958  | H | -3.330532 | -4.056205 | -3.701719 |
| H  | -1.159353 | -1.059384 | 3.001914  | H | -4.306263 | -5.010222 | -2.540226 |
| H  | 0.086156  | -1.748208 | 4.032271  | C | -3.779440 | -3.992038 | 0.952371  |
| H  | -1.231934 | 1.743537  | 0.889167  | H | -3.665888 | -3.743966 | 2.010164  |
| H  | -1.011711 | 1.591303  | -0.866776 | H | -4.516078 | -4.801755 | 0.839449  |
| H  | 0.190316  | 2.446454  | 0.109048  | N | -4.179576 | -2.968361 | -2.177297 |
| H  | -1.158673 | -1.367761 | -0.990223 | C | -5.003938 | -2.859759 | -0.999409 |
| H  | -0.178091 | -2.416381 | 0.041137  | H | -5.749141 | -3.666783 | -0.977073 |
| H  | -1.532031 | -1.516921 | 0.736846  | N | -4.302659 | -2.803682 | 0.283860  |
| Na | -3.698754 | 0.206222  | 3.710796  | C | -4.137413 | -1.790420 | -2.914411 |
| N  | 2.869322  | 4.619166  | -1.478000 | O | -3.575981 | -1.626983 | -3.981308 |
| C  | 3.463760  | 4.812029  | -0.174421 | C | -4.606350 | -1.650603 | 0.979309  |
| H  | 3.796114  | 5.854760  | -0.062702 | O | -4.270126 | -1.384789 | 2.130754  |
| N  | 2.655862  | 4.424499  | 0.970735  | N | -4.899136 | -0.843420 | -2.231669 |
| C  | 3.504993  | 3.628704  | -2.217898 | C | -5.633000 | -1.433983 | -1.127328 |
| O  | 3.280098  | 3.343790  | -3.380473 | H | -6.710423 | -1.446598 | -1.342321 |
| C  | 3.296922  | 3.468898  | 1.758449  | N | -5.397193 | -0.851011 | 0.176308  |
| O  | 2.953563  | 3.104274  | 2.868261  | C | -5.256226 | 0.419025  | -2.849934 |
| N  | 4.476347  | 3.055933  | -1.401942 | H | -4.842368 | 0.409276  | -3.860914 |
| C  | 4.643118  | 3.782200  | -0.155344 | H | -6.352558 | 0.499551  | -2.900449 |
| H  | 5.634690  | 4.257738  | -0.128316 | C | -5.957963 | 0.408008  | 0.620645  |
| N  | 4.420652  | 3.035335  | 1.063622  | H | -5.997411 | 0.390001  | 1.709817  |
| C  | 5.480506  | 2.158970  | -1.942499 | H | -6.980176 | 0.483280  | 0.231683  |

|   |          |           |           |   |           |          |           |
|---|----------|-----------|-----------|---|-----------|----------|-----------|
| H | 5.302240 | 2.088068  | -3.017729 | N | -4.723681 | 1.591535 | -2.181889 |
| H | 6.478166 | 2.585163  | -1.758822 | C | -5.376307 | 2.243100 | -1.061399 |
| C | 5.377036 | 2.106525  | 1.634956  | H | -6.440921 | 2.407474 | -1.278631 |
| H | 5.130948 | 1.997718  | 2.693466  | N | -5.231291 | 1.595648 | 0.225100  |
| H | 6.385044 | 2.532820  | 1.530597  | C | -3.828213 | 2.443104 | -2.827204 |
| N | 5.439530 | 0.812883  | -1.412561 | O | -3.285103 | 2.237451 | -3.896357 |
| C | 6.054992 | 0.410691  | -0.164244 | C | -4.371313 | 2.274147 | 1.069003  |
| H | 7.093299 | 0.772503  | -0.125587 | O | -4.110753 | 1.948503 | 2.225103  |
| N | 5.361672 | 0.776032  | 1.057400  | N | -3.709014 | 3.589430 | -2.049844 |
| C | 5.077431 | -0.271690 | -2.203332 | C | -4.562790 | 3.566799 | -0.888088 |
| O | 4.685086 | -0.223520 | -3.355183 | H | -5.192589 | 4.466746 | -0.858697 |
| C | 4.984718 | -0.337014 | 1.802410  | N | -3.901849 | 3.389939 | 0.405350  |
| O | 4.577198 | -0.330272 | 2.949812  | C | -2.951381 | 4.744979 | -2.488288 |
| N | 5.295162 | -1.424239 | -1.456931 | H | -3.578510 | 5.639285 | -2.365328 |
| C | 5.947410 | -1.153896 | -0.192221 | H | -2.721033 | 4.598238 | -3.545635 |
| H | 6.926092 | -1.655640 | -0.161169 | C | -3.226038 | 4.480720 | 1.102481  |
| N | 5.198267 | -1.462547 | 1.012487  | H | -3.155835 | 4.196005 | 2.154593  |
| C | 5.156918 | -2.742917 | -2.037103 | H | -3.843227 | 5.386532 | 1.004627  |
| H | 6.087147 | -3.305999 | -1.869792 | N | -1.693553 | 4.947689 | -1.804746 |
| H | 4.994988 | -2.608255 | -3.108792 | C | -1.568198 | 5.582792 | -0.509372 |
| C | 5.027712 | -2.801441 | 1.542474  | H | -2.158585 | 6.510880 | -0.487297 |
| H | 4.787652 | -2.696600 | 2.602766  | N | -1.884059 | 4.766555 | 0.648575  |
| H | 5.969527 | -3.357585 | 1.428798  | C | -0.477676 | 4.845614 | -2.472562 |
| N | 4.039133 | -3.517557 | -1.531506 | O | -0.320768 | 4.491915 | -3.627516 |
| C | 4.096236 | -4.300295 | -0.310549 | C | -0.788878 | 4.607493 | 1.496743  |
| H | 5.017478 | -4.901100 | -0.292805 | O | -0.811839 | 4.116837 | 2.609405  |
| N | 3.959603 | -3.570624 | 0.932572  | N | 0.516556  | 5.268536 | -1.598581 |
| C | 2.995512 | -3.912623 | -2.363131 | C | -0.024926 | 5.828636 | -0.374238 |
| O | 2.813534 | -3.553539 | -3.512575 | H | 0.239057  | 6.894076 | -0.302042 |
| C | 2.792673 | -3.893573 | 1.615277  | N | 0.320087  | 5.148630 | 0.857314  |
| O | 2.491607 | -3.529298 | 2.738310  | C | 1.874144  | 5.495017 | -2.056712 |
| N | 2.223774 | -4.829457 | -1.657899 | H | 1.881095  | 5.323560 | -3.135267 |
| C | 2.793311 | -5.166848 | -0.372019 | H | 2.153344  | 6.537280 | -1.844393 |
| H | 2.987833 | -6.248264 | -0.318160 | C | 1.604427  | 5.263848 | 1.519490  |
| N | 2.045768 | -4.740002 | 0.798634  | H | 1.928810  | 6.314781 | 1.483791  |
| C | 1.126170 | -5.544681 | -2.271916 | H | 1.458852  | 4.958011 | 2.557896  |
| H | 1.154486 | -5.323597 | -3.341074 |   |           |          |           |

### Optimized structure of inclusion complex of TSP and CB[7] using DFT calculation

The initial conformers of the inclusion complex of TSP and CB[7] were constructed, in which the trimethylsilyl group of Group A and B TSP was located in the CB[7] cavity based on the inclusion complex structure was estimated by NMR measurements. All conformations in water were optimized using a SAS model at B3LYP/6-31+g(d) level, the structures with the smallest energy were regarded as the optimized conformation of the inclusion complex (Fig. S14 Groups A' and B'). The stabilization energies  $E$  ( $\text{kJ mol}^{-1}$ ) for the inclusion complexation were calculated using the following equation:  $E = E_{\text{TSP\_complex}} - (E_{\text{TSP}} + E_{\text{CB[7]}})$ , where  $E_{\text{TSP\_complex}}$ ,  $E_{\text{TSP}}$ , and  $E_{\text{CB[7]}}$  represent the total energy of the inclusion complex, TSP, and CB[7], respectively.

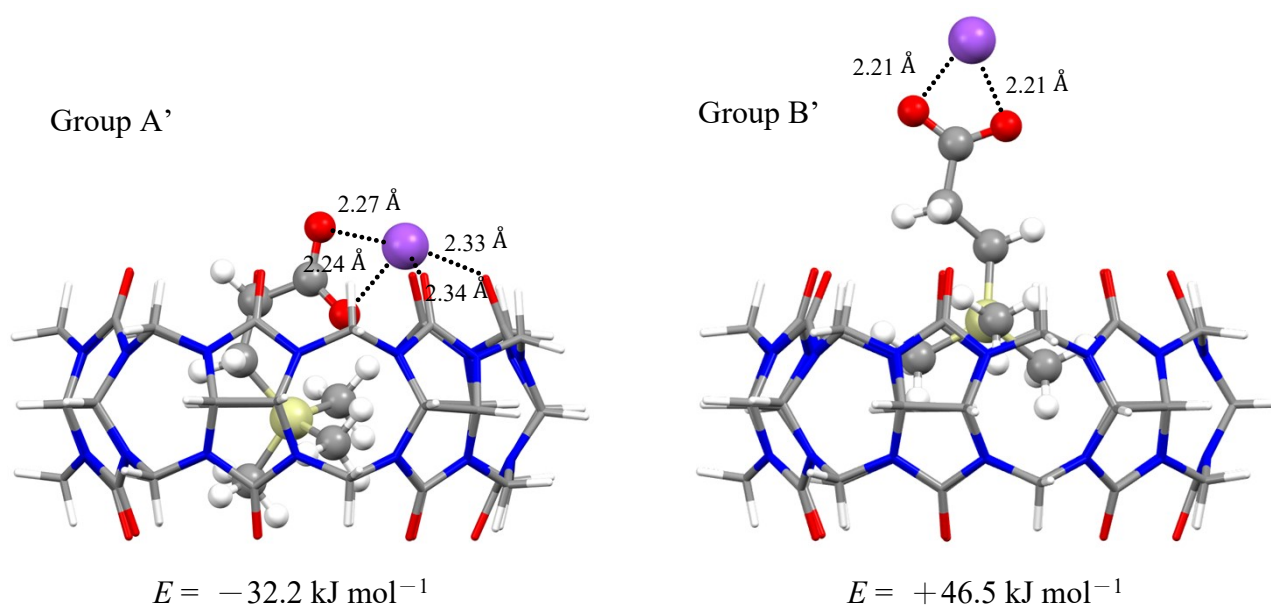

**Fig. S14** Optimized structures of inclusion complex of TSP and CB[7].

**Table S5** Atomic coordinates and energies of inclusion complex of TSP and CB[7] (Groups A and

B).

Inclusion complex of TSP and CB[7] Group A'

$$E_{\text{TSP\_complex\_A}'} = -5051.2910134 \text{ (a.u.)}$$

|    |           |           |           |   |           |          |           |
|----|-----------|-----------|-----------|---|-----------|----------|-----------|
| C  | 0.025947  | -1.801254 | 0.049229  | H | -4.829658 | 2.646753 | 2.946546  |
| Si | -0.248233 | 0.017071  | 0.483756  | H | -5.961901 | 3.336721 | 1.740093  |
| C  | -1.434328 | 0.020850  | 1.967889  | N | -3.976773 | 3.612150 | -1.150226 |
| C  | 1.362175  | 0.795720  | 1.093530  | C | -4.037174 | 4.324555 | 0.107690  |
| C  | -1.088677 | 0.996999  | -0.923444 | H | -4.948885 | 4.939509 | 0.146265  |
| C  | -0.971598 | 0.462175  | -2.363185 | N | -3.930092 | 3.531357 | 1.318879  |
| C  | 0.461534  | 0.286893  | -2.860934 | C | -2.861010 | 3.952698 | -1.905841 |
| O  | 1.387683  | 0.253856  | -1.990966 | O | -2.646990 | 3.626130 | -3.059305 |
| O  | 0.663349  | 0.147278  | -4.109308 | C | -2.828575 | 3.890906 | 2.088160  |
| H  | 0.770155  | -1.907562 | -0.744518 | O | -2.592242 | 3.521311 | 3.225096  |
| H  | -0.900285 | -2.284397 | -0.283842 | N | -2.062578 | 4.781644 | -1.123756 |
| H  | 0.376906  | -2.341356 | 0.936717  | C | -2.719548 | 5.173481 | 0.108749  |
| H  | -1.659729 | 1.030335  | 2.333481  | H | -2.903816 | 6.258540 | 0.106831  |
| H  | -2.387653 | -0.460929 | 1.721192  | N | -2.069709 | 4.788273 | 1.344710  |
| H  | -1.007550 | -0.541948 | 2.808244  | C | -0.911161 | 5.464244 | -1.679192 |
| H  | 1.211556  | 1.845775  | 1.373176  | H | -0.864430 | 5.200385 | -2.738000 |
| H  | 2.120088  | 0.755215  | 0.307521  | H | -1.050727 | 6.550887 | -1.572817 |
| H  | 1.735400  | 0.276016  | 1.985149  | C | -0.948727 | 5.500269 | 1.922008  |
| H  | -2.155983 | 1.084555  | -0.670978 | H | -0.925280 | 5.262363 | 2.987636  |
| H  | -0.691211 | 2.021672  | -0.892058 | H | -1.109541 | 6.580858 | 1.786650  |
| H  | -1.458812 | -0.518829 | -2.454321 | N | 0.361563  | 5.100158 | -1.087712 |
| H  | -1.499535 | 1.119028  | -3.062505 | C | 0.868018  | 5.681417 | 0.136590  |
| Na | 2.857912  | -0.155773 | -3.625881 | H | 0.729029  | 6.773217 | 0.117004  |
| N  | 1.894944  | -4.781870 | -1.052229 | N | 0.347131  | 5.142097 | 1.379356  |
| C  | 1.644218  | -5.572499 | 0.138563  | C | 1.352389  | 4.446929 | -1.814686 |
| H  | 2.242436  | -6.495700 | 0.107150  | O | 1.253668  | 4.028655 | -2.952565 |
| N  | 1.828308  | -4.908001 | 1.411488  | C | 1.352752  | 4.623647 | 2.188834  |
| C  | 0.758087  | -4.651123 | -1.847650 | O | 1.239028  | 4.289110 | 3.354893  |
| O  | 0.725521  | -4.195473 | -2.976334 | N | 2.500321  | 4.411960 | -1.021732 |
| C  | 0.645644  | -4.797758 | 2.134619  | C | 2.373642  | 5.252895 | 0.155099  |
| O  | 0.542552  | -4.413442 | 3.286377  | H | 3.067765  | 6.104134 | 0.081320  |
| N  | -0.310427 | -5.191749 | -1.145049 | N | 2.524394  | 4.606705 | 1.440274  |
| C  | 0.098982  | -5.836246 | 0.085920  | C | 3.775560  | 4.019654 | -1.581326 |
| H  | -0.156937 | -6.905786 | 0.049560  | H | 3.608277  | 3.783404 | -2.634166 |
| N  | -0.385430 | -5.258144 | 1.325446  | H | 4.481420  | 4.860677 | -1.498285 |
| C  | -1.623451 | -5.333106 | -1.739804 | C | 3.799092  | 4.229898 | 2.012601  |
| H  | -1.528683 | -5.063482 | -2.793961 | H | 3.640238  | 4.093838 | 3.084439  |



|   |           |           |           |   |          |           |           |
|---|-----------|-----------|-----------|---|----------|-----------|-----------|
| H | -1.941665 | -6.382791 | -1.651234 | H | 4.521443 | 5.041563  | 1.843935  |
| C | -1.725257 | -5.451846 | 1.844950  | N | 4.378031 | 2.846448  | -0.969727 |
| H | -1.683536 | -5.254444 | 2.918297  | C | 5.126349 | 2.885126  | 0.283629  |
| H | -2.026490 | -6.495534 | 1.670525  | H | 5.877908 | 3.686367  | 0.234957  |
| N | -2.650550 | -4.479361 | -1.173860 | N | 4.363182 | 2.995205  | 1.504173  |
| C | -3.399009 | -4.809308 | 0.024765  | C | 4.640627 | 1.700949  | -1.691459 |
| H | -3.748149 | -5.851698 | -0.028122 | O | 4.318752 | 1.480948  | -2.856282 |
| N | -2.735878 | -4.575701 | 1.289767  | C | 4.422265 | 1.841290  | 2.278478  |
| C | -3.288285 | -3.508644 | -1.941107 | O | 3.985334 | 1.708220  | 3.406368  |
| O | -2.986757 | -3.171261 | -3.071616 | N | 5.397034 | 0.854843  | -0.900232 |
| C | -3.366669 | -3.597972 | 2.052021  | C | 5.751877 | 1.452295  | 0.371450  |
| O | -3.115418 | -3.315569 | 3.209752  | H | 6.846027 | 1.460069  | 0.482533  |
| N | -4.361122 | -3.026712 | -1.199852 | N | 5.131962 | 0.887685  | 1.553573  |
| C | -4.567630 | -3.766055 | 0.026760  | C | 5.914876 | -0.408711 | -1.380477 |
| H | -5.564760 | -4.231609 | 0.020130  | H | 6.968714 | -0.490601 | -1.084966 |
| N | -4.372996 | -3.039042 | 1.268011  | H | 5.848445 | -0.400703 | -2.469255 |
| C | -5.314971 | -2.088342 | -1.753226 | C | 5.523289 | -0.373418 | 2.148604  |
| H | -6.327983 | -2.502036 | -1.637978 | H | 5.197641 | -0.348827 | 3.190998  |
| H | -5.079624 | -1.977676 | -2.814021 | H | 6.618832 | -0.470231 | 2.105234  |
| C | -5.366613 | -2.144517 | 1.833105  | N | 5.216410 | -1.585933 | -0.906334 |
| H | -5.163061 | -2.070702 | 2.903650  | C | 5.467945 | -2.214045 | 0.375459  |
| H | -6.366479 | -2.576155 | 1.674207  | H | 6.547720 | -2.378842 | 0.500527  |
| N | -5.276217 | -0.762913 | -1.168033 | N | 4.923422 | -1.546532 | 1.540738  |
| C | -5.966763 | -0.403051 | 0.054955  | C | 4.332961 | -2.306669 | -1.687962 |
| H | -7.001584 | -0.776729 | 0.021985  | O | 4.011771 | -2.025556 | -2.841050 |
| N | -5.342583 | -0.796662 | 1.302504  | C | 4.048568 | -2.364124 | 2.251758  |
| C | -4.926586 | 0.352210  | -1.924156 | O | 3.593922 | -2.139666 | 3.358159  |
| O | -4.522566 | 0.343916  | -3.072581 | N | 3.927395 | -3.415047 | -0.972559 |
| C | -5.009554 | 0.297535  | 2.095107  | C | 4.639852 | -3.538816 | 0.294096  |
| O | -4.661729 | 0.261962  | 3.261590  | H | 5.264209 | -4.443703 | 0.278029  |
| N | -5.170776 | 1.479620  | -1.146429 | N | 3.833682 | -3.509703 | 1.491599  |
| C | -5.877697 | 1.161752  | 0.077799  | C | 3.211435 | -4.522585 | -1.589190 |
| H | -6.863579 | 1.651112  | 0.075130  | H | 3.086262 | -4.277207 | -2.645739 |
| N | -5.194231 | 1.441203  | 1.325486  | H | 3.826796 | -5.429887 | -1.490596 |
| C | -5.058916 | 2.818245  | -1.692748 | C | 3.117588 | -4.656764 | 2.016437  |
| H | -4.873306 | 2.714176  | -2.764009 | H | 3.750546 | -5.548434 | 1.897051  |
| H | -6.007955 | 3.349505  | -1.529465 | H | 2.941070 | -4.468962 | 3.077710  |
| C | -5.029773 | 2.768788  | 1.879755  |   |          |           |           |

# Inclusion complex of TSP and CB[7] Group B'

$$E_{\text{TSP\_complex\_B'}} = -5051.2625154 \text{ (a.u.)}$$

|    |           |           |           |   |           |           |           |
|----|-----------|-----------|-----------|---|-----------|-----------|-----------|
| C  | 0.520598  | -1.493232 | 1.573726  | H | 0.243547  | 5.149086  | -3.611213 |
| Si | -0.099316 | 0.284313  | 1.454836  | H | 0.158745  | 6.548474  | -2.493223 |
| C  | 1.117671  | 1.275308  | 0.392671  | N | -1.216476 | 5.021654  | 0.409049  |
| C  | -1.737467 | 0.253037  | 0.507924  | C | -1.741924 | 5.447168  | -0.874541 |
| C  | -0.246327 | 1.019492  | 3.198779  | H | -1.779341 | 6.546125  | -0.918059 |
| C  | -1.241203 | 0.304470  | 4.132091  | N | -1.074389 | 4.930382  | -2.050711 |
| C  | -1.109017 | 0.634723  | 5.623133  | C | -2.167967 | 4.337755  | 1.163289  |
| O  | -2.134388 | 0.451160  | 6.365279  | O | -2.072853 | 4.039653  | 2.339718  |
| O  | 0.007182  | 1.033617  | 6.090287  | C | -1.894998 | 4.106956  | -2.812239 |
| H  | -0.198512 | -2.127653 | 2.102188  | O | -1.635150 | 3.647920  | -3.910976 |
| H  | 1.465374  | -1.557221 | 2.124121  | N | -3.264059 | 4.092159  | 0.339725  |
| H  | 0.676940  | -1.923385 | 0.574728  | C | -3.156850 | 4.778219  | -0.932397 |
| H  | 0.718263  | 2.261351  | 0.127801  | H | -3.976855 | 5.504794  | -1.035438 |
| H  | 2.067781  | 1.426286  | 0.912227  | N | -3.085452 | 3.944082  | -2.114570 |
| H  | 1.328086  | 0.746227  | -0.546673 | C | -4.510296 | 3.554360  | 0.859562  |
| H  | -2.125139 | 1.262060  | 0.327020  | H | -4.400438 | 3.478686  | 1.943611  |
| H  | -2.494853 | -0.307620 | 1.062194  | H | -5.324196 | 4.252877  | 0.616126  |
| H  | -1.605660 | -0.231075 | -0.469514 | C | -4.232013 | 3.288417  | -2.705206 |
| H  | 0.755684  | 0.991045  | 3.646743  | H | -3.972204 | 3.058277  | -3.740793 |
| H  | -0.508412 | 2.082986  | 3.131626  | H | -5.089727 | 3.977491  | -2.681493 |
| H  | -2.276898 | 0.502176  | 3.838926  | N | -4.864140 | 2.234010  | 0.378101  |
| H  | -1.125154 | -0.788093 | 4.067050  | C | -5.474642 | 1.961594  | -0.906239 |
| Na | -0.920289 | 1.096167  | 8.094470  | H | -6.354692 | 2.606537  | -1.048229 |
| N  | 3.408058  | -4.160860 | 0.975420  | N | -4.612670 | 2.042941  | -2.071413 |
| C  | 4.160678  | -4.276769 | -0.256632 | C | -4.855283 | 1.119307  | 1.210249  |
| H  | 4.682096  | -5.245292 | -0.286212 | O | -4.544499 | 1.104947  | 2.387136  |
| N  | 3.428293  | -4.073729 | -1.492661 | C | -4.530674 | 0.835703  | -2.755292 |
| C  | 3.824626  | -3.080950 | 1.747220  | O | -4.017194 | 0.660461  | -3.846703 |
| O  | 3.494922  | -2.848253 | 2.896593  | N | -5.312133 | 0.035878  | 0.466953  |
| C  | 3.945168  | -3.028342 | -2.249393 | C | -5.833419 | 0.436382  | -0.826454 |
| O  | 3.641705  | -2.751521 | -3.396894 | H | -6.915550 | 0.242817  | -0.871676 |
| N  | 4.722339  | -2.337913 | 0.984038  | N | -5.186750 | -0.123442 | -1.994942 |
| C  | 5.135313  | -3.051437 | -0.212007 | C | -5.528721 | -1.264172 | 1.071326  |
| H  | 6.193478  | -3.341443 | -0.128628 | H | -5.327003 | -1.152644 | 2.139033  |
| N  | 4.906175  | -2.388971 | -1.477157 | H | -6.577422 | -1.561484 | 0.921492  |
| C  | 5.481376  | -1.244288 | 1.562868  | C | -5.433427 | -1.456786 | -2.502150 |
| H  | 5.173722  | -1.161032 | 2.607520  | H | -5.175756 | -1.453988 | -3.563495 |
| H  | 6.554838  | -1.482821 | 1.510708  | H | -6.501378 | -1.688464 | -2.379577 |
| C  | 5.748297  | -1.340441 | -2.013856 | N | -4.673126 | -2.330543 | 0.578520  |
| H  | 5.584770  | -1.315373 | -3.093394 | C | -4.970421 | -3.110574 | -0.606279 |

|   |           |           |           |   |           |           |           |
|---|-----------|-----------|-----------|---|-----------|-----------|-----------|
| H | 6.798225  | -1.589184 | -1.802398 | H | -6.026111 | -3.420147 | -0.595340 |
| N | 5.259901  | 0.048589  | 0.943301  | N | -4.648198 | -2.501520 | -1.880906 |
| C | 5.954078  | 0.499241  | -0.247791 | C | -3.715575 | -2.940185 | 1.385382  |
| H | 7.031757  | 0.299578  | -0.151834 | O | -3.385445 | -2.585530 | 2.502292  |
| N | 5.468245  | -0.012056 | -1.512689 | C | -3.681327 | -3.208283 | -2.583883 |
| C | 4.672644  | 1.100986  | 1.640740  | O | -3.328417 | -3.002167 | -3.732187 |
| O | 4.173631  | 1.036519  | 2.749601  | N | -3.232171 | -4.054541 | 0.703139  |
| C | 4.951393  | 0.985148  | -2.330793 | C | -3.971714 | -4.314717 | -0.516382 |
| O | 4.602133  | 0.855191  | -3.491155 | H | -4.473723 | -5.291432 | -0.449550 |
| N | 4.795292  | 2.246623  | 0.860237  | N | -3.226126 | -4.226532 | -1.755447 |
| C | 5.612214  | 2.027595  | -0.316469 | C | -2.389893 | -5.040838 | 1.354966  |
| H | 6.501972  | 2.673659  | -0.279652 | H | -2.873923 | -6.026143 | 1.270567  |
| N | 4.955460  | 2.166886  | -1.601142 | H | -2.311008 | -4.760084 | 2.407465  |
| C | 4.424147  | 3.559990  | 1.356779  | C | -2.321774 | -5.250199 | -2.231775 |
| H | 5.287007  | 4.233276  | 1.247279  | H | -2.189076 | -5.084709 | -3.303115 |
| H | 4.177637  | 3.445673  | 2.414713  | H | -2.773855 | -6.238061 | -2.061318 |
| C | 4.633253  | 3.438238  | -2.213278 | N | -1.035924 | -5.126368 | 0.839589  |
| H | 4.515723  | 3.257109  | -3.283938 | C | -0.683685 | -5.859654 | -0.364006 |
| H | 5.464589  | 4.138252  | -2.043617 | H | -1.117457 | -6.870406 | -0.328024 |
| N | 3.270839  | 4.165042  | 0.718898  | N | -1.006214 | -5.232755 | -1.626754 |
| C | 3.310820  | 4.862864  | -0.550788 | C | 0.068892  | -4.925694 | 1.664580  |
| H | 4.120767  | 5.607610  | -0.543768 | O | 0.041678  | -4.577771 | 2.831273  |
| N | 3.406257  | 4.046769  | -1.744620 | C | 0.124235  | -4.856866 | -2.340506 |
| C | 2.083881  | 4.387910  | 1.409511  | O | 0.144308  | -4.416417 | -3.476797 |
| O | 1.849896  | 4.069772  | 2.560371  | N | 1.205772  | -5.241244 | 0.926725  |
| C | 2.295467  | 4.172875  | -2.569009 | C | 0.882379  | -5.859316 | -0.342142 |
| O | 2.178869  | 3.719769  | -3.694506 | H | 1.316706  | -6.869427 | -0.387558 |
| N | 1.227000  | 5.083731  | 0.560442  | N | 1.231713  | -5.120140 | -1.541602 |
| C | 1.883386  | 5.502839  | -0.661656 | C | 2.538081  | -5.198808 | 1.499862  |
| H | 1.904503  | 6.601521  | -0.719218 | H | 2.420029  | -5.009524 | 2.568917  |
| N | 1.362235  | 4.955015  | -1.898775 | H | 3.021779  | -6.174359 | 1.347179  |
| C | -0.040409 | 5.612889  | 1.023814  | C | 2.572057  | -5.076959 | -2.087048 |
| H | -0.100847 | 5.408565  | 2.095050  | H | 3.040227  | -6.066322 | -1.967848 |
| H | -0.057906 | 6.699895  | 0.851497  | H | 2.482389  | -4.837428 | -3.148900 |
| C | 0.175164  | 5.450602  | -2.563734 |   |           |           |           |
